# Supplementary material for: Analysis of influencing factors of serum total protein and serum calcium content in plasma donors
Source: PeerJ. 2022 Dec 9;10:e14474. doi: 10.7717/peerj.14474 (PMC9745925; doi:10.7717/peerj.14474)
Supplement: Supplemental Information 1 — Changes of total protein and serum calcium of plasma donors in different regions, gender, age, weight, frequency and blood type. [file peerj-10-14474-s001.xlsx]

## Sheet: serum calcium
Note: gender (1: male, 2: female);frequency (1: 1-6, 2: 7-11, 3:12-16, 4:≥17); Blood type (A: 1, B: 2, AB: 3, O: 4);BMI (1:≤18.4, 2:18.5-23.9, 3:24-27.9, 4:≥28); Age (1:18-29, 2:30-39, 3:50-59, 4:60); Area (1:Shandong , 2:Jiangxi , 3:Hubei , 4:sichuan, 5:Ningxia ); Serum calcium: 1: below normal, 0 :normal
frequency	gender	age	blood type	BMI	region	serum calcium
1	1	1	4	2	3	1
2	2	3	1	3	1	1
3	1	3	3	2	1	1
3	2	3	1	2	1	1
2	2	1	3	4	1	1
4	1	2	2	2	1	1
3	2	4	2	3	1	1
3	2	1	2	3	1	1
2	1	1	4	3	1	1
3	2	1	4	3	1	1
2	2	2	1	3	1	1
3	2	2	1	4	1	1
3	2	2	3	4	1	1
2	2	3	2	4	1	1
3	1	4	1	4	1	1
2	2	1	4	4	1	1
2	2	2	2	3	1	1
1	2	3	1	3	3	1
2	2	2	1	3	3	1
2	1	3	2	2	1	1
1	2	3	4	3	3	1
2	2	3	4	4	1	1
3	2	4	3	2	1	1
3	1	1	4	2	1	1
2	2	2	1	3	1	1
3	2	2	1	3	1	1
2	2	3	3	3	1	1
2	2	3	2	4	1	1
2	2	1	1	3	1	1
2	2	3	2	4	1	1
2	2	3	4	4	1	1
3	1	4	4	4	1	1
2	2	1	1	2	1	1
2	2	2	3	3	1	1
2	2	2	4	3	1	1
3	2	2	2	4	1	1
3	1	3	1	2	1	1
2	2	3	2	4	1	1
2	1	1	1	3	1	1
3	2	2	2	4	1	1
4	1	4	1	2	3	1
3	1	2	4	2	1	1
3	2	2	2	2	1	1
1	2	3	1	2	1	1
3	1	3	1	3	1	1
4	1	4	1	3	1	1
4	1	4	2	4	1	1
3	1	1	4	4	1	1
3	2	1	2	4	1	1
3	2	2	2	3	1	1
2	2	4	4	3	1	1
4	2	4	2	3	3	1
2	2	1	4	3	2	1
2	1	1	1	4	1	1
2	1	2	2	2	1	1
3	2	2	2	4	1	1
2	2	3	1	2	1	1
2	2	3	3	2	1	1
2	1	3	4	3	3	1
3	2	3	2	3	1	1
2	2	3	2	4	1	1
2	2	4	1	3	3	1
2	2	4	1	3	1	1
2	1	1	4	3	1	1
2	2	1	2	3	1	1
2	2	1	4	3	1	1
2	1	2	3	3	1	1
3	1	2	4	4	1	1
2	2	2	4	4	1	1
2	2	3	4	3	1	1
2	2	3	4	3	1	1
3	2	3	1	3	1	1
1	2	3	2	4	1	1
2	2	3	2	4	1	1
3	2	3	4		4	1
1	1	4	4	2	3	1
1	2	4	1	3	2	1
3	1	2	2	1	1	1
3	2	2	1	3	1	1
2	2	2	1	4	1	1
2	1	3	4	2	1	1
4	2	3	2	2	3	1
1	1	3	2	3	3	1
4	2	4	1	2	3	1
4	2	4	3	3	1	1
3	1	1	4	2	1	1
3	2	1	4	4	1	1
3	1	2	4	2	1	1
1	1	2	1	3	3	1
2	1	2	2	4	1	1
2	2	2	4	4	1	1
2	1	3	2	2	1	1
2	2	3	4	2	1	1
4	2	3	2	2	2	1
2	2	3	2	3	2	1
2	2	4	4	2	3	1
2	1	1	1	2	1	1
2	2	1	4	4	1	1
2	2	2	1	2	1	1
2	1	2	2	3	1	1
2	2	2	3	4	1	1
2	1	3	3	2	2	1
1	2	3	2	2	3	1
4	2	3	4	3	3	1
3	1	3	4	4	1	1
2	2	3	4	4	1	1
2	1	4	1	4	1	1
3	1	1	3	3	1	1
2	2	2	1	2	3	1
2	1	2	2	3	1	1
3	1	2	4	4	1	1
2	2	3	2	2	1	1
4	2	3	1	2	3	1
2	1	3	4	3	1	1
3	2	3	2	3	1	1
3	1	3	2	4	1	1
2	2	4	4	4	1	1
2	1	2	1	3	1	1
2	1	2	3	3	3	1
2	2	2	2	3	1	1
3	2	2	2	3	2	1
3	1	2	1	4	1	1
3	1	2	4	4	1	1
2	1	3	2	2	1	1
4	2	3	4	2	2	1
1	1	3	2	3	3	1
2	2	3	4	3	1	1
3	2	4	2	2	3	1
2	1	4	1	3	3	1
1	2	1	1	2	1	1
2	2	1	3	2	1	1
3	1	1	4	3	1	1
2	1	1	4	4	1	1
1	2	2	2	2	2	1
2	1	2	4	3	2	1
3	1	2	2	4	1	1
4	1	2	4	4	2	1
2	2	3	1	4	1	1
2	2	3	1	4	1	1
3	1	4	4	2	1	1
2	1	4	1	3	1	1
2	2	4	2	3	1	1
3	2	4	4	4	1	1
3	1	1	1	1	1	1
2	1	1	4	3	1	1
1	2	1	2	3	1	1
2	1	2	4	2	1	1
2	1	2	4	2	1	1
2	2	2	2	2	3	1
4	2	2	2	2	3	1
2	2	2	2	3	1	1
3	2	2	3	4	1	1
1	2	3	1	2	3	1
2	2	3	2	2	1	1
2	2	3	4	2	3	1
2	1	3	4	3	1	1
3	1	3	3	3	1	1
2	2	3	2	3	1	1
4	1	4	4	3	3	1
2	1	4	2	4	1	1
1	2	4	4	4	3	1
2	1	1	1	3	2	1
2	1	2	2	2	1	1
2	2	2	4	2	1	1
1	1	2	1	3	1	1
3	1	2	1	3	1	1
2	2	2	4	3	3	1
2	2	2	4	3	3	1
2	1	3	2	2	3	1
4	1	3	1	2	2	1
4	1	3	2	2	3	1
1	2	3	3	2	1	1
2	2	3	3	3	3	1
3	2	3	1	3	1	1
3	1	4	3	2	3	1
1	2	4	1	2	1	1
4	1	4	2	3	1	1
1	2	4	1	3	3	1
1	2	4	3	3	1	1
4	2	4	4	3	2	1
1	2	1	2	1	3	1
3	1	1	4	2	1	1
2	2	1	4	4	1	1
3	1	2	1	2	1	1
1	2	2	1	2	1	1
3	2	2	1	2	1	1
2	2	2	1	3	1	1
2	2	2	4	3	1	1
2	1	2	2	4	2	1
2	2	3	3	2	3	1
2	2	3	4	2	2	1
2	1	3	1	3	3	1
2	1	3	2	3	2	1
2	1	3	2	3	1	1
4	1	3	1	3	3	1
1	2	3	3	3	1	1
3	1	3	4	4	1	1
2	2	3	4		4	1
2	1	4	1	2	1	1
3	1	4	1	2	1	1
1	2	4	1	2	3	1
2	2	4	3	2	3	1
1	1	4	1	3	3	1
3	1	4	4	3	1	1
2	1	4	4	4	1	1
2	2	4	2	4	3	1
3	1	1	4	2	1	1
2	2	1	2	3	1	1
3	2	1	1	3	5	1
2	1	2	1	2	1	1
2	1	2	1	2	1	1
1	2	2	2	2	1	1
2	2	2	4	2	1	1
1	1	2	2	3	1	1
4	1	2	4	4	3	1
3	2	3	4	1	2	1
2	1	3	2	2	1	1
2	1	3	4	3	1	1
1	2	3	2	3	3	1
1	2	3	4	3	3	1
2	1	4	4	2	3	1
4	1	4	1	2	3	1
4	1	4	2	3	3	1
2	2	4	2	3	2	1
2	2	4	4	3	1	1
4	2	4	4	3	3	1
4	2	4	4	4	3	1
2	1	4	4		4	1
1	1	1	1	2	3	1
2	1	1	1	2	1	1
2	1	1	2	3	1	1
3	1	1	4	3	1	1
2	2	1	2	3	1	1
2	2	1	4	3	1	1
2	1	1	1	4	1	1
3	1	1	2	4	1	1
4	1	2	1	2	2	1
4	2	2	1	2	3	1
2	1	2	2	3	3	1
3	1	2	1	3	1	1
2	2	2	2	4	1	1
3	2	2	2	4	2	1
4	2	3	4	2	3	1
2	1	3	2	3	1	1
3	1	3	2	3	1	1
2	2	3	2	3	2	1
4	2	3	1	3	3	1
4	1	3	3	4	3	1
4	2	3	1	4	3	1
4	2	3	4	4	2	1
4	1	4	4	2	3	1
1	2	4	4	2	2	1
4	2	4	4	2	3	1
2	1	4	1	3	1	1
2	2	4	1	3	1	1
3	1	1	2	3	1	1
3	1	1	3	3	1	1
3	2	1	2	3	1	1
2	1	1	2	4	1	1
2	1	2	3	3	3	1
2	1	2	4	3	1	1
3	1	2	1	3	1	1
1	1	3	4	2	2	1
4	2	3	2	2	3	1
4	2	3	2	2	3	1
3	1	3	1	3	3	1
1	2	3	4	3	3	1
2	2	3	4	3	2	1
2	2	3	4	3	2	1
4	2	3	4	3	2	1
2	2	3	1	4	3	1
4	1	4	2	2	3	1
4	1	4	3	2	3	1
1	2	4	1	2	3	1
1	2	4	2	2	2	1
2	1	4	4	3	3	1
1	2	4	2	3	1	1
2	2	4	3	3	3	1
2	2	4	4	3	1	1
2	2	4	1	3	5	1
3	1	4	2	4	1	1
4	1	4	2	4	3	1
2	1	1	4	2	1	1
2	1	1	4	2	1	1
2	1	1	1	3	1	1
2	1	2	4	2	1	1
3	1	2	4	3	2	1
3	1	2	4	3	1	1
4	1	2	4	3	3	1
3	2	2	4	4	1	1
1	2	3	1	2	3	1
4	2	3	1	2	2	1
3	1	3	1	3	2	1
4	1	3	1	3	1	1
3	2	3	2	3	1	1
4	1	3	1		4	1
3	1	4	1	2	4	1
4	1	4	2	2	3	1
3	2	4	4	2	2	1
4	2	4	1	3	3	1
4	2	4	4	3	2	1
2	1	4	2	4	2	1
3	2	4	2		4	1
3	2	1	4	3	1	1
1	1	2	2	2	3	1
2	1	2	4	2	1	1
1	2	2	2	2	3	1
2	2	2	1	2	1	1
2	1	3	4	2	3	1
3	1	3	1	2	2	1
3	1	3	2	2	2	1
3	2	3	1	2	2	1
3	1	3	4	3	2	1
1	2	3	1	3	3	1
2	2	3	4	3	2	1
3	2	3	4	3	3	1
2	2	3	2		4	1
2	1	4	2	2	1	1
4	2	4	1	2	3	1
4	2	4	1	2	3	1
1	1	4	3	3	1	1
3	2	4	4	3	1	1
4	2	4	2	3	3	1
2	2	4	4	4	1	1
2	1	1	2	3	1	1
3	2	1	2	4	1	1
3	1	2	2	2	1	1
1	2	2	2	3	2	1
1	2	2	2	3	1	1
2	2	2	1	3	1	1
2	1	2	3	4	1	1
2	1	2	4	4	1	1
3	1	2	1	4	3	1
2	2	2	1	4	1	1
2	1	3	1	2	2	1
1	2	3	4	2	1	1
2	2	3	4	2	3	1
1	1	3	4	3	3	1
2	1	3	1	3	3	1
3	1	3	4	3	2	1
4	1	3	4	3	2	1
1	2	3	1	3	2	1
1	2	3	4	3	3	1
4	2	3	1	3	3	1
4	2	3	4	4	3	1
1	1	4	2	2	3	1
1	2	4	1	2	2	1
4	2	4	4	2	3	1
1	1	4	1	3	3	1
4	2	4	4	3	3	1
4	2	4	4	4	1	1
1	1	1	4	1	3	1
1	1	1	2	2	1	1
2	1	1	4	2	1	1
3	1	1	1	2	1	1
3	2	1	4	4	1	1
1	1	2	4	2	3	1
2	1	2	2	2	1	1
3	2	2	2	2	1	1
2	1	2	4	3	3	1
4	1	2	3	3	3	1
1	2	2	1	3	1	1
4	2	2	1	3	5	1
2	2	2	2	4	1	1
2	1	3	2	2	3	1
3	1	3	1	2	3	1
1	2	3	1	2	1	1
2	2	3	2	2	1	1
2	2	3	4	2	2	1
4	2	3	2	2	1	1
3	1	3	1	3	1	1
1	2	3	1	3	3	1
1	2	3	2	3	3	1
1	2	3	4	3	2	1
2	2	3	4	3	3	1
3	2	3	2	3	1	1
3	2	3	3	3	3	1
4	2	3	4	3	3	1
2	1	3	2	4	1	1
2	2	3	1		4	1
3	1	4	4	2	3	1
1	2	4	1	2	3	1
2	2	4	4	3	1	1
4	2	4	1	3	2	1
3	1	4	2	4	3	1
4	1	4	2	4	2	1
4	1	4	2	4	3	1
2	2	1	1	2	2	1
2	1	1	1	3	3	1
2	1	1	2	4	1	1
1	1	2	2	3	1	1
3	1	2	4	3	1	1
1	2	2	1	3	3	1
1	2	2	2	3	3	1
1	1	3	4	2	3	1
2	1	3	2	2	3	1
3	1	3	4	2	1	1
4	1	3	1	2	2	1
1	2	3	4	2	3	1
4	2	3	2	2	2	1
4	2	3	2	2	3	1
4	2	3	4	2	2	1
1	1	3	4	3	3	1
2	1	3	1	3	1	1
2	1	3	4	3	1	1
3	1	3	1	3	1	1
4	1	3	2	3	2	1
1	2	3	1	3	3	1
2	2	3	1	4	1	1
2	2	3	2	4	1	1
3	2	3	4		4	1
3	1	4	4	2	1	1
4	1	4	4	2	3	1
4	2	4	1	2	2	1
4	2	4	4	2	2	1
3	1	4	2	3	1	1
4	2	4	2	3	2	1
3	1	4	1	4	1	1
2	2	4	1	4	1	1
2	2	4	4	4	1	1
2	2	4	2		4	1
1	1	1	4	2	3	1
1	1	1	4	2	1	1
1	2	1	1	2	3	1
2	1	1	3	3	1	1
2	2	1	1	3	1	1
3	1	2	1	3	1	1
2	2	2	2	3	1	1
2	2	2	4	3	3	1
2	2	2	2	4	1	1
2	2	2	2	4	1	1
4	1	3	4	2	4	1
4	1	3	4	2	2	1
1	2	3	1	2	5	1
2	1	3	1	3	2	1
1	2	3	4	3	1	1
2	2	3	1	3	2	1
4	2	3	4	3	3	1
2	1	3	1	4	1	1
2	1	3	2	4	2	1
4	2	4	1	1	3	1
2	1	4	1	2	3	1
2	1	4	2	2	1	1
3	1	4	1	2	3	1
1	1	4	2	3	2	1
4	1	4	2	3	2	1
3	2	4	3	3	2	1
4	2	4	2	3	2	1
2	2	4	3	4	2	1
1	1	1	1	1	1	1
1	1	1	2	2	3	1
1	1	1	4	2	3	1
2	1	1	1	2	1	1
3	2	1	2	2	1	1
2	1	1	4	3	1	1
3	1	1	2	3	1	1
2	2	1	2	3	1	1
2	2	1	4	3	1	1
2	1	1	4	4	1	1
1	1	2	2	2	3	1
1	2	2	1	2	2	1
3	2	2	2	3	1	1
3	2	2	4	4	1	1
1	1	3	2	2	3	1
3	1	3	1	2	2	1
1	2	3	1	2	2	1
3	2	3	2	2	2	1
4	2	3	1	2	3	1
1	2	3	3	3	1	1
2	2	3	3	3	3	1
1	1	3	3	4	3	1
4	1	3	4	4	3	1
1	2	3	1	4	3	1
1	2	3	2	4	1	1
4	2	3	4	4	1	1
4	2	3	4	4	1	1
1	1	4	2	2	3	1
2	1	4	4	2	2	1
4	1	4	1	2	4	1
4	2	4	1	2	2	1
4	2	4	2	2	3	1
4	2	4	4	2	2	1
1	1	4	4	3	3	1
3	1	4	2	3	1	1
1	2	4	4	3	2	1
2	2	4	2	3	1	1
4	2	4	3	3	3	1
1	1	1	1	1	3	1
2	1	1	1	2	1	1
2	1	1	3	2	3	1
2	2	1	4	2	1	1
2	1	1	4	3	1	1
3	2	1	2	3	1	1
3	1	1	2	4	1	1
4	1	2	1	2	1	1
1	2	2	4	2	1	1
4	2	2	4	3	3	1
1	2	2	2	4	1	1
3	1	3	1	2	2	1
4	1	3	1	2	3	1
4	1	3	4	2	3	1
3	2	3	1	2	2	1
3	2	3	1	2	2	1
3	2	3	3	2	2	1
3	1	3	1	3	1	1
3	1	3	2	3	3	1
3	2	3	4	3	2	1
3	2	3	4	3	1	1
3	2	3	4	3	1	1
4	2	3	4	3	1	1
1	1	3	1	4	3	1
1	1	3	2	4	1	1
1	1	3	4	4	1	1
2	2	3	1	4	3	1
2	2	3	2	4	3	1
2	2	3	2	4	1	1
2	2	4	4	2	3	1
3	2	4	2	2	2	1
3	2	4	4	2	2	1
3	1	4	3	3	2	1
3	1	4	4	3	3	1
4	1	4	1	3	3	1
4	1	4	4	3	2	1
4	1	4	4	3	1	1
4	2	4	1	3	1	1
4	2	4	2	3	3	1
4	2	4	4	3	5	1
1	1	1	4	2	1	1
2	1	1	1	2	1	1
4	1	1	1	4	3	1
2	2	1	2	4	1	1
2	1	2	2	2	2	1
2	1	2	4	2	1	1
3	1	2	4	2	2	1
1	2	2	2	2	3	1
3	2	2	2	2	3	1
3	2	2	2	2	1	1
1	1	2	1	3	3	1
2	2	2	1	3	3	1
3	2	2	3	4	1	1
1	2	3	1	2	2	1
1	2	3	4	2	2	1
3	1	3	1	3	2	1
1	2	3	4	3	1	1
3	2	3	1	3	3	1
4	2	3	2	3	3	1
4	2	3	1	3	5	1
1	1	3	2	4	1	1
2	1	3	2	4	3	1
4	2	3	3	4	1	1
4	2	3	4	4	2	1
2	1	4	4	2	2	1
3	1	4	1	2	1	1
2	2	4	4	2	2	1
3	2	4	1	2	5	1
3	2	4	4	2	2	1
1	1	4	4	3	3	1
4	2	4	2	3	3	1
4	2	4	4	3	2	1
3	1	1	1	1	3	1
2	1	1	1	2	3	1
2	1	1	4	2	2	1
1	1	1	1	3	3	1
2	1	1	2	3	1	1
2	1	1	2	3	1	1
2	1	1	2	3	1	1
2	2	1	2	3	1	1
1	1	2	2	2	1	1
1	1	2	4	2	3	1
2	1	2	1	2	3	1
3	1	2	1	2	2	1
1	2	2	4	2	2	1
3	2	2	4	2	1	1
2	1	2	4	3	1	1
2	2	2	1	3	3	1
1	1	2	1	4	3	1
2	1	2	2	4	1	1
4	1	2	4	4	2	1
3	1	3	2	2	3	1
1	2	3	1	2	3	1
3	2	3	2	2	2	1
3	2	3	4	2	2	1
4	2	3	2	2	2	1
2	1	3	2	3	1	1
2	1	3	3	3	3	1
2	1	3	4	3	1	1
4	1	3	4	3	2	1
2	2	3	1	3	3	1
1	1	3	2	4	1	1
2	1	3	4	4	1	1
3	2	3	3	4	1	1
1	2	3	4		4	1
3	1	4	2	2	3	1
2	2	4	2	2	3	1
3	2	4	4	2	2	1
3	2	4	4	2	2	1
3	1	4	2	3	3	1
3	1	4	4	3	2	1
4	1	4	1	3	1	1
4	1	4	4	3	2	1
1	2	4	4	3	3	1
4	2	4	1	3	3	1
4	2	4	2	3	2	1
4	2	4	4	3	2	1
2	1	4	1	4	3	1
4	1	4	1	4	4	1
4	1	4	1	4	3	1
1	2	4	1	4	2	1
2	1	4	1		4	1
2	1	1	1	2	1	1
2	1	1	4	2	2	1
3	1	1	1	2	1	1
3	1	1	4	2	1	1
2	1	1	2	3	1	1
4	1	1	1	3	1	1
2	2	1	1	3	2	1
3	1	1	1	4	1	1
3	2	1	3	4	5	1
2	1	2	2	2	1	1
3	1	2	4	2	3	1
4	1	2	2	2	1	1
4	1	2	4	2	2	1
1	2	2	1	2	3	1
3	2	2	4	2	2	1
2	1	2	4	4	3	1
3	1	2	1	4	1	1
4	2	3	4	1	2	1
2	2	3	1	2	1	1
3	2	3	1	2	3	1
3	2	3	3	2	2	1
4	2	3	1	2	2	1
4	2	3	1	2	3	1
4	2	3	4	2	2	1
1	1	3	1	3	1	1
1	1	3	4	3	3	1
2	1	3	2	3	2	1
3	1	3	2	3	1	1
4	1	3	3	3	1	1
1	2	3	4	3	2	1
2	2	3	1	3	2	1
3	2	3	3	3	2	1
4	2	3	1	3	3	1
4	2	3	4	3	1	1
4	2	3	4	3	1	1
2	2	3	1	3	5	1
4	2	3	3	4	1	1
3	1	4	3	2	2	1
4	2	4	2	2	5	1
4	2	4	4	2	2	1
2	1	4	1	3	2	1
2	1	4	4	3	2	1
4	1	4	1	3	1	1
4	1	4	2	3	2	1
1	2	4	2	3	2	1
2	2	4	1	3	3	1
3	2	4	4	3	2	1
4	2	4	3	3	1	1
4	2	4	3	3	1	1
3	1	4	1	4	2	1
4	1	4	2	4	1	1
1	2	4	1	4	1	1
4	2	4	1	4	2	1
2	1	1	1	1	3	1
1	1	1	4	2	3	1
2	1	1	2	2	2	1
2	1	1	3	2	1	1
2	1	1	3	2	1	1
2	1	1	4	2	1	1
4	1	1	4	3	1	1
2	1	1	2	4	1	1
3	1	1	4	4	1	1
1	1	2	4	2	5	1
1	2	2	4	2	2	1
3	1	2	3	3	2	1
4	1	2	4	3	2	1
1	2	2	1	3	2	1
3	2	2	3	3	2	1
4	2	2	2	4	5	1
2	1	3	4	2	3	1
1	2	3	3	2	2	1
1	2	3	4	2	2	1
2	2	3	1	2	2	1
2	2	3	2	2	2	1
3	2	3	2	2	3	1
4	1	3	1	3	2	1
1	2	3	1	3	1	1
3	2	3	2	3	1	1
4	2	3	1	3	2	1
4	2	3	4	3	1	1
1	1	3	2	4	1	1
2	1	3	1	4	2	1
3	2	3	2	4	1	1
2	2	3	1		4	1
2	2	3	1		4	1
2	1	4	4	2	3	1
4	2	4	4	2	1	1
1	1	4	4	3	3	1
4	1	4	1	3	1	1
4	2	4	4	3	3	1
4	2	4	4	3	1	1
4	2	4	4	3	1	1
1	2	4	2	4	1	1
4	2	4	2	4	1	1
1	1	4	2		4	1
2	1	4	2		4	1
2	2	4	4		4	1
2	1	1	1	2	1	1
2	1	1	3	2	2	1
3	1	1	2	2	1	1
2	2	1	1	2	2	1
2	2	1	1	2	3	1
2	2	1	4	2	2	1
3	1	1	1	3	1	1
1	1	1	2	4	3	1
1	1	1	2	4	3	1
3	1	1	3	4	1	1
4	1	1	2	4	1	1
2	2	2	2	2	2	1
3	2	2	2	2	1	1
3	2	2	4	2	2	1
1	1	2	2	3	3	1
3	1	2	4	3	1	1
3	1	2	4	3	1	1
1	2	2	1	3	5	1
3	2	2	1	3	2	1
4	2	2	3	3	3	1
2	1	3	3	2	2	1
3	1	3	1	2	2	1
3	1	3	1	2	3	1
3	2	3	4	2	2	1
4	2	3	2	2	3	1
1	2	3	2	2	5	1
2	1	3	1	3	3	1
2	1	3	4	3	2	1
2	2	3	1	3	3	1
2	1	3	1	4	2	1
2	1	3	2	4	2	1
2	1	3	3	4	1	1
1	2	3	1	4	1	1
4	2	3	4	4	1	1
3	2	3	4		4	1
2	2	4	2	2	3	1
3	2	4	2	2	1	1
3	2	4	4	2	2	1
4	2	4	1	2	1	1
1	1	4	1	3	3	1
4	1	4	1	3	3	1
4	1	4	4	3	2	1
4	2	4	4	3	2	1
4	2	4	4	3	3	1
2	1	4	4	4	1	1
3	1	4	2	4	1	1
4	1	4	1	4	1	1
2	2	4	4	4	1	1
4	2	4	4	4	2	1
2	2	4	1		4	1
2	1	1	2	2	1	1
3	1	1	1	2	4	1
3	1	1	2	2	5	1
2	1	1	4	3	2	1
4	1	1	3	3	2	1
1	1	1	2	4	1	1
1	1	2	1	2	3	1
2	1	2	1	2	2	1
1	2	2	3	2	3	1
1	1	2	1	3	3	1
2	1	2	1	3	3	1
3	1	2	1	3	1	1
2	2	2	4	3	3	1
1	1	2	1	4	3	1
1	2	3	4	1	3	1
2	1	3	2	2	2	1
2	1	3	2	2	2	1
3	1	3	4	2	2	1
4	1	3	4	2	2	1
1	2	3	3	2	3	1
2	2	3	1	2	2	1
3	2	3	2	2	3	1
3	2	3	4	2	1	1
4	2	3	2	2	2	1
2	1	3	4	3	4	1
3	1	3	1	3	3	1
3	1	3	2	3	3	1
4	1	3	1	3	3	1
4	1	3	1	3	3	1
4	1	3	2	3	1	1
4	1	3	3	3	2	1
4	1	3	4	3	2	1
4	1	3	4	3	3	1
4	2	3	1	3	2	1
3	1	3	4	4	1	1
4	1	3	4	4	3	1
3	2	3	1	4	1	1
4	2	3	4	4	2	1
4	2	3	4	4	5	1
4	1	3	4		4	1
3	2	3	4		4	1
2	1	4	1	2	2	1
4	1	4	4	2	1	1
1	2	4	1	2	3	1
1	2	4	1	2	5	1
2	2	4	4	2	2	1
2	2	4	4	2	3	1
4	2	4	1	2	2	1
4	2	4	4	2	2	1
4	2	4	4	2	3	1
2	1	4	1	3	3	1
4	1	4	2	3	3	1
4	1	4	2	3	1	1
1	2	4	2	3	3	1
3	2	4	2	3	4	1
4	2	4	1	3	1	1
3	1	4	4	4	2	1
4	1	4	1	4	3	1
2	2	4	1	4	4	1
2	1	1	1	2	3	0
2	1	1	1	2	1	0
2	1	1	3	2	1	0
2	1	1	4	2	2	0
3	1	1	4	2	1	0
3	2	1	2	2	1	0
1	1	1	2	3	1	0
2	1	1	2	4	1	0
3	1	1	2	4	1	0
4	1	2	4	2	1	0
1	2	2	2	2	2	0
1	2	2	4	2	1	0
1	2	2	4	2	1	0
3	2	2	3	2	2	0
2	1	2	1	3	3	0
2	1	2	2	3	2	0
3	1	2	2	3	1	0
2	2	2	3	3	5	0
3	2	2	4	3	2	0
4	2	2	1	3	5	0
4	2	2	4	3	1	0
4	1	2	1	4	2	0
2	2	2	2	4	5	0
3	2	2	1	4	1	0
3	2	2	4	4	3	0
3	2	2	4	4	1	0
1	1	3	4	2	1	0
3	1	3	3	2	2	0
4	1	3	1	2	3	0
1	2	3	4	2	2	0
4	2	3	1	2	4	0
2	2	3	1	2	5	0
2	2	3	2	2	5	0
2	1	3	3	3	2	0
3	1	3	1	3	2	0
3	1	3	2	3	3	0
3	1	3	2	3	3	0
4	1	3	2	3	2	0
1	2	3	4	3	3	0
2	2	3	2	3	2	0
4	2	3	1	3	3	0
4	1	3	4	4	2	0
4	1	3	4	4	5	0
2	2	3	1	4	4	0
4	2	3	1	4	1	0
2	1	3	2		4	0
1	2	3	1		4	0
2	2	3	2		4	0
4	2	4	2	1	2	0
1	2	4	1	2	4	0
4	2	4	4	2	2	0
1	1	4	1	3	3	0
3	2	4	1	3	2	0
3	2	4	1	3	3	0
3	2	4	1	3	1	0
4	2	4	1	3	2	0
3	1	4	1	4	3	0
3	2	4	2	4	2	0
4	2	4	2	4	3	0
1	1	4	4		4	0
3	1	4	4		4	0
2	2	4	2		4	0
3	2	4	2		4	0
2	1	1	4	2	2	0
2	1	1	4	2	2	0
3	1	1	1	3	1	0
1	2	1	4	3	1	0
3	2	1	2	3	1	0
1	1	1	4	4	1	0
1	2	1	2	4	1	0
1	2	1	3	4	1	0
2	1	2	4	2	2	0
3	1	2	2	2	1	0
2	2	2	1	2	1	0
2	2	2	4	2	2	0
1	2	2	2	2	5	0
1	2	2	4	3	1	0
2	2	2	1	3	3	0
2	2	2	4	3	1	0
2	2	2	4	3	1	0
3	2	2	2	3	1	0
4	2	2	1	3	1	0
1	1	2	1	4	2	0
1	1	2	1	4	1	0
1	1	3	1	1	2	0
1	1	3	1	2	3	0
1	2	3	4	2	2	0
2	2	3	1	2	2	0
2	2	3	1	2	2	0
2	2	3	4	2	3	0
1	1	3	1	3	2	0
1	1	3	1	3	2	0
1	1	3	4	3	3	0
4	1	3	1	3	1	0
4	1	3	1	3	1	0
1	2	3	4	3	3	0
4	2	3	1	3	5	0
3	2	3	4	3	5	0
2	1	3	4	4	4	0
3	1	3	1	4	2	0
4	1	3	1	4	3	0
4	1	3	2	4	2	0
3	2	3	1	4	2	0
3	2	3	1	4	5	0
3	2	3	4	4	2	0
4	2	3	1	4	3	0
4	1	3	1		4	0
2	1	4	2	2	4	0
3	1	4	4	2	3	0
4	1	4	2	2	5	0
4	1	4	3	2	5	0
4	2	4	3	2	1	0
4	2	4	4	2	5	0
1	1	4	1	3	2	0
1	1	4	2	3	1	0
2	1	4	1	3	2	0
2	1	4	3	3	3	0
4	1	4	1	3	4	0
4	1	4	1	3	3	0
4	1	4	4	3	3	0
2	2	4	2	3	1	0
3	2	4	2	3	2	0
4	2	4	4	3	3	0
4	2	4	4	3	1	0
3	2	4	4	3	5	0
2	1	4	1	4	4	0
2	2	4	1	4	3	0
3	2	4	1	4	4	0
4	2	4	4	4	2	0
3	2	4	1		4	0
2	1	1	1	2	2	0
2	1	1	1	2	2	0
3	1	1	4	2	3	0
1	2	1	2	2	1	0
1	1	1	2	3	1	0
3	2	1	2	3	1	0
4	2	1	1	4	5	0
1	2	2	3	2	1	0
3	2	2	1	2	1	0
2	1	2	2	3	3	0
2	1	2	4	3	2	0
3	1	2	2	3	1	0
4	1	2	1	3	2	0
4	1	2	1	3	3	0
4	1	2	1	3	1	0
4	1	2	1	3	1	0
1	2	2	4	3	2	0
3	2	2	4	3	5	0
1	1	2	4	4	3	0
2	1	2	2	4	1	0
4	1	2	4	4	2	0
2	1	3	2	2	3	0
4	1	3	1	2	3	0
4	1	3	4	2	3	0
1	2	3	1	2	2	0
2	2	3	4	2	3	0
3	2	3	1	2	2	0
1	2	3	2	2	5	0
1	1	3	4	3	2	0
2	1	3	4	3	2	0
3	1	3	4	3	2	0
4	1	3	2	3	1	0
1	2	3	3	3	3	0
1	2	3	4	3	5	0
2	2	3	2	3	4	0
4	2	3	1	3	1	0
1	2	3	4	3	1	0
3	2	3	1	3	5	0
2	2	3	3	4	2	0
4	2	3	4	4	5	0
2	1	3	2		4	0
3	1	3	1		4	0
2	1	4	4	2	2	0
4	1	4	3	2	3	0
4	1	4	4	2	4	0
4	1	4	4	2	3	0
1	2	4	2	2	5	0
1	2	4	4	2	3	0
2	2	4	1	2	2	0
4	2	4	2	2	1	0
4	1	4	1	3	1	0
4	1	4	1	3	1	0
4	1	4	3	3	1	0
1	2	4	1	3	3	0
1	2	4	3	3	3	0
2	2	4	1	3	3	0
3	2	4	1	3	2	0
3	2	4	4	3	2	0
3	2	4	4	3	3	0
4	2	4	2	3	1	0
4	1	4	2	4	2	0
3	2	4	2	4	4	0
3	1	4	4		4	0
1	1	1	1	2	3	0
1	1	1	2	2	1	0
1	1	1	2	2	1	0
2	1	1	1	2	3	0
3	1	1	4	2	1	0
4	1	1	4	2	2	0
2	1	1	4	3	1	0
3	1	2	1	1	1	0
1	1	2	3	2	2	0
2	1	2	2	2	3	0
2	1	2	2	2	1	0
4	2	2	4	2	2	0
1	1	2	1	3	2	0
1	1	2	4	3	2	0
2	1	2	4	3	1	0
4	1	2	2	3	1	0
1	2	2	2	3	3	0
2	2	2	1	3	5	0
2	2	2	2	3	5	0
3	1	2	1	4	3	0
4	1	2	2	4	1	0
2	2	2	2	4	5	0
3	1	3	2	2	4	0
4	1	3	4	2	3	0
1	2	3	2	2	4	0
1	2	3	2	2	2	0
1	2	3	3	2	2	0
1	2	3	4	2	2	0
2	2	3	1	2	2	0
2	2	3	2	2	2	0
3	2	3	4	2	2	0
4	2	3	1	2	2	0
4	2	3	4	2	2	0
1	1	3	4	3	5	0
2	1	3	2	3	3	0
3	1	3	2	3	2	0
3	1	3	2	3	2	0
3	1	3	4	3	3	0
4	1	3	1	3	1	0
2	2	3	1	3	5	0
2	2	3	2	3	4	0
3	2	3	1	3	4	0
3	2	3	1	3	3	0
3	2	3	2	3	1	0
3	2	3	2	3	1	0
4	2	3	3	3	3	0
4	2	3	4	3	3	0
1	2	3	1	3	5	0
2	2	3	3	3	5	0
4	2	3	2	3	1	0
1	1	3	2		4	0
1	2	3	1		4	0
1	2	3	2		4	0
2	2	3	4		4	0
3	1	4	4	2	2	0
4	1	4	1	2	2	0
4	1	4	4	2	3	0
4	1	4	4	2	5	0
2	2	4	2	2	2	0
2	2	4	2	2	5	0
3	2	4	2	2	4	0
4	2	4	1	2	2	0
4	2	4	2	2	1	0
4	2	4	4	2	1	0
4	2	4	4	2	5	0
2	1	4	2	3	3	0
3	1	4	1	3	2	0
2	2	4	4	3	2	0
3	2	4	1	3	2	0
3	2	4	4	3	2	0
4	2	4	1	3	2	0
4	2	4	2	3	3	0
4	2	4	2	3	1	0
4	2	4	4	3	3	0
4	2	4	4	3	1	0
3	1	4	2	4	3	0
4	1	4	4	4	2	0
2	2	4	2	4	3	0
3	2	4	1	4	1	0
4	2	4	1	4	5	0
1	1	4	4		4	0
1	2	4	1		4	0
1	2	4	4		4	0
2	2	4	1		4	0
3	2	4	2		4	0
2	1	1	2	2	3	0
3	1	1	2	2	4	0
4	1	1	4	2	1	0
1	2	1	2	2	1	0
1	2	1	4	2	3	0
3	1	1	1	4	2	0
4	1	1	1	4	1	0
3	1	2	2	2	1	0
4	1	2	1	2	2	0
4	1	2	2	2	2	0
3	2	2	4	2	5	0
4	2	2	1	2	2	0
1	1	2	1	3	2	0
1	1	2	3	3	1	0
2	1	2	4	3	1	0
2	2	2	3	3	1	0
3	2	2	1	3	2	0
4	2	2	2	3	2	0
3	2	2	4	3	5	0
3	2	3	1	1	2	0
2	1	3	1	2	2	0
2	1	3	4	2	3	0
3	1	3	4	2	5	0
1	2	3	1	2	4	0
1	2	3	4	2	1	0
2	2	3	1	2	4	0
2	2	3	1	2	2	0
2	2	3	1	2	2	0
2	2	3	4	2	2	0
2	2	3	4	2	2	0
3	2	3	1	2	2	0
3	2	3	2	2	3	0
3	2	3	4	2	2	0
3	2	3	4	2	2	0
4	2	3	1	2	2	0
4	2	3	4	2	2	0
4	2	3	4	2	2	0
1	2	3	2	2	5	0
4	1	3	2	3	3	0
4	1	3	3	3	2	0
4	1	3	4	3	5	0
3	1	3	3	3	5	0
1	2	3	2	3	2	0
3	2	3	4	3	2	0
4	2	3	4	3	1	0
4	2	3	4	3	5	0
1	2	3	2	3	5	0
1	1	3	1	4	4	0
4	1	3	1	4	3	0
2	2	3	3	4	3	0
3	2	3	2	4	1	0
2	1	3	1		4	0
3	1	3	4		4	0
4	1	3	3		4	0
3	2	3	4		4	0
2	2	3	1		4	0
1	1	4	4	2	2	0
2	1	4	2	2	3	0
4	1	4	2	2	2	0
4	1	4	2	2	3	0
1	2	4	1	2	5	0
1	2	4	4	2	5	0
2	2	4	3	2	4	0
2	2	4	4	2	3	0
3	2	4	1	2	2	0
3	2	4	2	2	3	0
4	2	4	3	2	4	0
4	2	4	3	2	1	0
4	2	4	4	2	1	0
1	1	4	2	3	4	0
1	1	4	4	3	3	0
3	1	4	4	3	2	0
3	1	4	4	3	3	0
4	1	4	1	3	3	0
4	1	4	4	3	4	0
2	2	4	2	3	3	0
2	2	4	4	3	3	0
2	2	4	4	3	1	0
3	2	4	2	3	5	0
3	2	4	4	3	2	0
4	2	4	4	3	2	0
1	2	4	1	3	5	0
4	2	4	4	4	1	0
1	1	1	2	2	1	0
2	1	1	3	2	3	0
2	1	1	4	2	2	0
3	1	1	2	2	3	0
4	1	1	4	2	2	0
3	1	1	2	2	5	0
2	2	1	1	2	5	0
2	2	1	2	2	1	0
4	2	1	4	2	5	0
1	1	1	2	3	3	0
3	1	1	1	3	3	0
4	1	1	2	3	1	0
1	2	1	1	3	5	0
1	2	1	2	3	1	0
1	2	1	4	3	5	0
2	2	1	2	3	5	0
3	1	1	3	4	1	0
1	2	1	4	4	1	0
2	2	2	4	1	3	0
1	1	2	1	2	5	0
2	1	2	1	2	4	0
4	1	2	2	2	5	0
4	1	2	4	2	1	0
3	2	2	1	2	1	0
4	2	2	4	2	3	0
1	1	2	1	3	3	0
1	1	2	2	3	2	0
1	1	2	4	3	1	0
3	1	2	1	3	2	0
4	1	2	1	3	3	0
4	1	2	2	3	2	0
2	2	2	2	3	5	0
3	2	2	4	3	5	0
4	2	2	4	3	1	0
2	2	2	2	3	5	0
4	1	2	2	4	4	0
3	2	2	4		4	0
1	1	3	3	2	2	0
2	1	3	2	2	2	0
2	1	3	4	2	4	0
4	1	3	1	2	2	0
4	1	3	2	2	1	0
1	1	3	2	2	5	0
1	2	3	1	2	2	0
1	2	3	4	2	3	0
2	2	3	4	2	5	0
3	2	3	1	2	4	0
3	2	3	1	2	2	0
3	2	3	3	2	2	0
4	2	3	1	2	4	0
4	2	3	3	2	4	0
4	2	3	2	2	3	0
1	1	3	1	3	1	0
1	1	3	2	3	2	0
4	1	3	1	3	1	0
4	1	3	4	3	2	0
1	1	3	1	3	5	0
1	2	3	2	3	1	0
1	2	3	4	3	2	0
2	2	3	2	3	5	0
2	2	3	4	3	2	0
3	2	3	2	3	3	0
4	2	3	4	3	2	0
4	2	3	4	3	1	0
4	2	3	4	3	5	0
2	1	3	2	4	2	0
3	1	3	1	4	3	0
3	1	3	2	4	5	0
4	1	3	1	4	4	0
2	2	3	3	4	3	0
2	2	3	4	4	3	0
4	2	3	2	4	3	0
4	2	3	2	4	1	0
1	2	3	1		4	0
1	2	3	4		4	0
3	2	3	1		4	0
3	2	3	2		4	0
1	1	4	2	2	2	0
2	1	4	1	2	2	0
4	1	4	2	2	1	0
4	1	4	4	2	3	0
4	1	4	4	2	3	0
2	1	4	4	2	5	0
2	2	4	1	2	2	0
2	2	4	1	2	3	0
3	2	4	1	2	2	0
3	2	4	2	2	1	0
4	2	4	1	2	5	0
4	2	4	1	2	5	0
4	2	4	2	2	4	0
1	2	4	4	2	5	0
1	1	4	1	3	4	0
3	1	4	2	3	4	0
3	1	4	4	3	3	0
3	1	4	4	3	3	0
4	1	4	1	3	1	0
4	1	4	2	3	3	0
1	2	4	4	3	1	0
2	2	4	1	3	1	0
3	2	4	1	3	4	0
3	2	4	2	3	4	0
3	2	4	4	3	3	0
4	2	4	1	3	5	0
4	2	4	2	3	4	0
2	2	4	1	3	5	0
4	2	4	4	3	5	0
4	1	4	2	4	5	0
4	1	4	4	4	2	0
4	2	4	2	4	3	0
4	2	4	3	4	5	0
4	2	4	4	4	1	0
3	2	4	4	4	5	0
4	2	4	2	4	5	0
1	1	4	1		4	0
3	1	4	1		4	0
3	1	4	4		4	0
2	2	4	1		4	0
3	1	1	4	2	4	0
1	2	1	1	2	3	0
1	2	1	2	2	3	0
2	2	1	1	2	5	0
2	2	1	2	2	5	0
1	2	1	1	3	5	0
3	2	1	1	3	5	0
3	1	1	2	4	1	0
1	2	1	2	4	3	0
2	1	2	2	1	2	0
1	1	2	2	2	1	0
2	1	2	2	2	5	0
4	1	2	1	2	1	0
2	2	2	1	2	2	0
2	2	2	1	2	3	0
3	2	2	1	2	3	0
3	2	2	4	2	2	0
3	2	2	4	2	5	0
4	2	2	4	2	1	0
2	1	2	2	3	3	0
3	1	2	4	3	1	0
4	1	2	4	3	3	0
3	2	2	4	3	3	0
4	2	2	4	3	1	0
2	2	2	1	3	5	0
3	1	2	1	4	3	0
1	2	2	1	4	4	0
1	2	2	2	4	1	0
4	2	2	2	4	5	0
4	2	2	4	4	5	0
1	1	2	4		4	0
1	1	3	1	2	5	0
3	1	3	2	2	3	0
4	1	3	2	2	2	0
1	2	3	2	2	1	0
1	2	3	4	2	2	0
1	2	3	4	2	3	0
2	2	3	1	2	4	0
2	2	3	4	2	5	0
3	2	3	1	2	2	0
3	2	3	2	2	2	0
3	2	3	2	2	2	0
4	2	3	4	2	5	0
1	1	3	1	3	3	0
1	1	3	4	3	4	0
1	1	3	4	3	2	0
2	1	3	4	3	2	0
3	1	3	1	3	2	0
4	1	3	1	3	1	0
2	2	3	1	3	4	0
4	2	3	4	3	5	0
1	1	3	1	4	1	0
1	1	3	2	4	1	0
2	1	3	4	4	3	0
3	1	3	3	4	1	0
3	1	3	4	4	4	0
4	1	3	3	4	4	0
1	2	3	1	4	2	0
3	2	3	4	4	1	0
2	1	3	4		4	0
1	2	3	4		4	0
1	1	4	4	2	2	0
2	1	4	2	2	2	0
3	1	4	1	2	4	0
3	1	4	2	2	2	0
2	2	4	1	2	5	0
4	2	4	2	2	1	0
4	2	4	3	2	2	0
1	1	4	1	3	2	0
2	1	4	4	3	2	0
3	1	4	1	3	3	0
3	1	4	4	3	3	0
4	1	4	1	3	1	0
1	2	4	1	3	3	0
4	2	4	1	3	1	0
4	2	4	2	3	4	0
4	2	4	3	3	3	0
4	2	4	4	3	1	0
3	1	4	1	4	1	0
4	1	4	2	4	3	0
2	2	4	4	4	3	0
4	2	4	2	4	1	0
1	1	4	1		4	0
3	1	4	1		4	0
3	1	4	1		4	0
3	2	4	1		4	0
2	1	1	1	2	2	0
3	1	1	2	2	1	0
2	2	1	2	2	4	0
3	2	1	2	2	2	0
3	1	1	1	4	4	0
4	1	1	4	4	1	0
4	2	1	2	4	2	0
3	1	2	4	2	2	0
4	1	2	1	2	4	0
4	1	2	1	2	5	0
4	1	2	4	2	1	0
1	2	2	2	2	3	0
2	2	2	2	2	2	0
3	2	2	1	2	3	0
3	2	2	3	3	1	0
4	2	2	2	3	5	0
1	2	2	1	3	5	0
1	1	2	2	4	2	0
2	1	2	3	4	5	0
1	2	2	1	4	2	0
1	2	2	2	4	4	0
1	2	2	4	4	5	0
1	1	2	3		4	0
3	1	2	2		4	0
4	1	3	1	2	1	0
1	2	3	1	2	4	0
1	2	3	1	2	4	0
1	2	3	1	2	2	0
1	2	3	1	2	5	0
1	2	3	2	2	4	0
2	2	3	1	2	3	0
3	2	3	2	2	1	0
4	2	3	1	2	4	0
4	2	3	2	2	2	0
4	2	3	4	2	1	0
1	2	3	1	2	5	0
4	1	3	2	3	5	0
1	2	3	2	3	2	0
2	2	3	1	3	2	0
3	2	3	1	3	1	0
3	2	3	2	3	3	0
4	2	3	4	3	4	0
1	2	3	1	3	5	0
1	2	3	3	3	5	0
1	1	3	2	4	2	0
2	1	3	3	4	3	0
3	1	3	1	4	3	0
3	1	3	2	4	1	0
1	2	3	1	4	1	0
1	2	3	2	4	1	0
3	2	3	1	4	4	0
4	2	3	1	4	3	0
4	2	3	2	4	2	0
4	2	3	3	4	1	0
2	1	3	4		4	0
3	1	3	2		4	0
2	2	3	4		4	0
1	1	4	2	2	4	0
4	1	4	1	2	3	0
4	1	4	2	2	1	0
4	1	4	4	2	3	0
1	2	4	4	2	2	0
3	2	4	1	2	2	0
3	2	4	3	2	5	0
4	2	4	1	2	1	0
4	2	4	2	2	1	0
4	2	4	4	2	2	0
1	1	4	1	3	2	0
2	1	4	1	3	2	0
4	1	4	2	3	2	0
4	1	4	3	3	1	0
3	2	4	2	3	1	0
4	2	4	1	3	3	0
4	2	4	3	3	5	0
4	2	4	4	3	1	0
1	1	4	4	4	4	0
2	1	4	1	4	3	0
3	1	4	1	4	2	0
4	1	4	2	4	3	0
4	1	4	2	4	1	0
2	1	4	4	4	5	0
4	2	4	1	4	4	0
4	2	4	2	4	3	0
4	2	4	2	4	1	0
2	1	4	1		4	0
3	1	4	1		4	0
3	1	4	2		4	0
3	1	4	4		4	0
3	2	4	2		4	0
2	1	1	1	2	2	0
3	1	1	1	2	5	0
1	2	1	1	2	2	0
2	2	1	1	2	2	0
2	2	1	2	2	5	0
1	1	1	1	3	2	0
3	1	1	4	3	5	0
1	1	1	2	4	1	0
1	1	1	4	4	1	0
1	1	1	2		4	0
3	1	2	3	2	4	0
4	1	2	3	2	3	0
1	2	2	2	2	4	0
1	2	2	2	2	2	0
1	2	2	2	2	5	0
3	2	2	1	2	2	0
4	2	2	4	2	3	0
4	2	2	4	2	1	0
3	1	2	2	3	3	0
4	1	2	1	3	1	0
4	1	2	1	3	5	0
2	2	2	2	3	1	0
2	2	2	2	3	5	0
2	2	2	3	3	5	0
3	2	2	4	3	4	0
3	2	2	4	3	3	0
4	2	2	2	3	1	0
1	2	2	4	3	5	0
1	1	2	1	4	1	0
1	1	2	2	4	4	0
1	1	2	2	4	3	0
2	1	2	4	4	1	0
1	2	2	2	4	1	0
2	2	2	4	4	2	0
1	2	2	4		4	0
2	2	2	2		4	0
1	1	3	1	2	3	0
1	1	3	4	2	2	0
3	1	3	3	2	3	0
4	1	3	4	2	1	0
1	2	3	1	2	3	0
1	2	3	4	2	2	0
2	2	3	1	2	2	0
2	2	3	3	2	2	0
3	2	3	1	2	2	0
3	2	3	1	2	3	0
3	2	3	1	2	5	0
3	2	3	1	2	5	0
3	2	3	3	2	3	0
4	2	3	1	2	5	0
1	1	3	2	3	3	0
3	1	3	1	3	5	0
4	1	3	2	3	3	0
4	1	3	4	3	4	0
4	1	3	4	3	2	0
1	2	3	1	3	1	0
1	2	3	2	3	5	0
3	2	3	2	3	2	0
3	2	3	4	3	4	0
4	2	3	1	3	1	0
3	2	3	2	3	5	0
4	2	3	2	3	5	0
4	2	3	4	3	5	0
3	1	3	2	4	5	0
2	2	3	2	4	2	0
3	2	3	4	4	2	0
4	2	3	4	4	5	0
1	1	3	4		4	0
2	1	3	1		4	0
1	2	3	3		4	0
2	2	4	2	1	3	0
4	1	4	2	2	2	0
1	2	4	2	2	2	0
1	2	4	2	2	2	0
1	2	4	4	2	3	0
2	2	4	2	2	3	0
3	2	4	1	2	3	0
3	2	4	2	2	2	0
3	2	4	4	2	3	0
1	2	4	2	2	5	0
1	1	4	1	3	2	0
3	1	4	1	3	2	0
3	1	4	3	3	1	0
4	1	4	1	3	2	0
4	1	4	1	3	2	0
4	1	4	4	3	5	0
1	2	4	1	3	2	0
1	2	4	2	3	4	0
3	2	4	1	3	5	0
4	2	4	1	3	1	0
4	2	4	2	3	1	0
4	2	4	4	3	2	0
4	2	4	4	3	5	0
2	1	4	2	4	5	0
2	1	4	4	4	3	0
4	1	4	1	4	3	0
2	2	4	1	4	4	0
3	2	4	3	4	5	0
1	1	1	2	2	3	0
2	1	1	4	2	3	0
4	1	1	1	2	1	0
4	1	1	4	2	1	0
1	1	1	2	2	5	0
1	2	1	4	2	5	0
1	1	1	1	3	1	0
1	1	1	2	3	5	0
2	1	1	2	3	2	0
2	1	1	3	3	3	0
4	1	1	3	3	1	0
1	1	1	4	4	1	0
1	1	1	4	4	1	0
3	1	1	4	4	5	0
2	1	2	2	2	3	0
3	1	2	2	2	3	0
2	2	2	1	2	2	0
2	2	2	2	2	3	0
3	2	2	2	2	5	0
3	2	2	4	2	4	0
3	2	2	4	2	2	0
4	2	2	4	2	1	0
1	2	2	2	2	5	0
1	1	2	3	3	1	0
2	1	2	1	3	3	0
4	1	2	2	3	1	0
1	1	2	3	3	5	0
1	2	2	1	3	3	0
1	2	2	4	3	5	0
2	2	2	1	3	3	0
3	2	2	2	3	1	0
3	2	2	4	3	4	0
2	2	2	3	3	5	0
2	2	2	2	4	4	0
3	2	2	4	4	1	0
4	2	2	2	4	1	0
2	2	2	4	4	5	0
2	1	2	3		4	0
1	2	2	1		4	0
3	1	3	1	2	2	0
3	1	3	1	2	3	0
4	1	3	4	2	3	0
4	1	3	4	2	1	0
1	2	3	1	2	2	0
1	2	3	2	2	2	0
1	2	3	4	2	5	0
2	2	3	2	2	1	0
2	2	3	4	2	3	0
3	2	3	1	2	2	0
3	2	3	2	2	4	0
3	2	3	3	2	2	0
3	2	3	4	2	4	0
4	2	3	2	2	1	0
2	1	3	1	3	3	0
2	1	3	2	3	5	0
2	1	3	3	3	5	0
2	1	3	4	3	4	0
3	1	3	2	3	3	0
3	1	3	4	3	4	0
4	1	3	2	3	2	0
4	1	3	2	3	5	0
4	1	3	3	3	5	0
1	2	3	1	3	2	0
1	2	3	3	3	3	0
1	2	3	4	3	5	0
3	2	3	2	3	4	0
3	2	3	4	3	2	0
4	2	3	1	3	4	0
4	2	3	4	3	5	0
3	1	3	4	4	4	0
4	1	3	1	4	2	0
4	1	3	2	4	5	0
1	1	3	2	4	5	0
1	2	3	2	4	1	0
1	2	3	2	4	1	0
1	2	3	3	4	3	0
1	2	3	4	4	4	0
2	2	3	1	4	3	0
3	2	3	4	4	3	0
3	2	3	4	4	3	0
4	2	3	4	4	1	0
1	1	3	2		4	0
2	1	3	4		4	0
2	2	3	1		4	0
3	2	3	2		4	0
2	1	4	1	2	3	0
3	1	4	1	2	4	0
3	1	4	4	2	3	0
4	1	4	1	2	2	0
4	1	4	1	2	1	0
1	2	4	4	2	3	0
3	2	4	4	2	3	0
4	2	4	2	2	5	0
2	1	4	4	3	2	0
3	1	4	2	3	4	0
3	1	4	2	3	4	0
1	1	4	2	3	5	0
4	1	4	2	3	5	0
2	2	4	4	3	4	0
3	2	4	4	3	4	0
4	2	4	1	3	2	0
4	2	4	1	3	3	0
2	1	4	1	4	4	0
2	1	4	1	4	4	0
2	1	4	1	4	3	0
4	2	4	1	4	4	0
4	2	4	1	4	2	0
4	2	4	1	4	3	0
4	2	4	4	4	3	0
4	2	4	2	4	5	0
1	1	4	1		4	0
1	2	4	4		4	0
1	2	1	4	1	3	0
3	1	1	1	2	3	0
3	1	1	3	2	1	0
1	2	1	2	2	1	0
4	2	1	3	2	2	0
1	1	1	4	3	5	0
2	1	1	3	3	5	0
4	1	1	3	3	5	0
4	2	1	2	3	5	0
1	1	1	1	4	2	0
1	1	1	3	4	2	0
1	1	1	4	4	2	0
4	2	1	2	4	1	0
1	2	2	1	2	2	0
1	2	2	1	2	5	0
1	2	2	4	2	5	0
3	2	2	1	2	1	0
2	1	2	4	3	2	0
2	1	2	4	3	5	0
1	1	2	4	3	5	0
3	2	2	2	3	5	0
1	2	2	3	3	5	0
2	2	2	2	3	5	0
3	1	2	2	4	3	0
3	2	2	4	4	2	0
1	1	2	4		4	0
1	1	3	4	2	4	0
2	1	3	1	2	4	0
2	1	3	1	2	3	0
3	1	3	4	2	4	0
4	1	3	1	2	5	0
4	1	3	4	2	3	0
1	2	3	1	2	2	0
1	2	3	2	2	2	0
1	2	3	2	2	1	0
1	2	3	4	2	2	0
1	2	3	4	2	2	0
2	2	3	2	2	2	0
2	2	3	2	2	1	0
3	2	3	3	2	5	0
4	2	3	2	2	1	0
4	2	3	4	2	2	0
1	1	3	4	3	5	0
2	1	3	4	3	4	0
3	1	3	4	3	2	0
4	1	3	4	3	2	0
4	1	3	4	3	5	0
1	2	3	1	3	1	0
1	2	3	2	3	3	0
2	2	3	4	3	3	0
3	2	3	1	3	4	0
3	2	3	4	3	2	0
4	2	3	4	3	3	0
1	1	3	4	4	4	0
1	1	3	4	4	2	0
3	1	3	2	4	3	0
4	1	3	1	4	3	0
4	1	3	4	4	3	0
1	2	3	2	4	1	0
2	2	3	4	4	4	0
3	2	3	4	4	5	0
1	2	3	1		4	0
2	2	3	2		4	0
2	2	3	4		4	0
3	2	3	2		4	0
1	1	4	1	2	5	0
2	1	4	1	2	4	0
4	1	4	1	2	4	0
4	1	4	2	2	3	0
3	2	4	3	2	3	0
4	2	4	4	2	1	0
2	1	4	3	3	3	0
4	1	4	1	3	3	0
4	1	4	1	3	3	0
4	1	4	1	3	5	0
4	1	4	2	3	4	0
4	1	4	4	3	4	0
4	1	4	4	3	2	0
1	2	4	4	3	4	0
2	2	4	3	3	2	0
2	2	4	3	3	2	0
2	2	4	4	3	3	0
3	2	4	1	3	4	0
3	2	4	4	3	4	0
4	2	4	1	3	4	0
4	2	4	1	3	1	0
4	2	4	4	3	2	0
4	2	4	4	3	2	0
4	2	4	4	3	1	0
1	1	4	1	4	3	0
1	1	4	1	4	5	0
2	1	4	1	4	3	0
3	2	4	2	4	1	0
4	2	4	1	4	4	0
4	2	4	1	4	4	0
4	2	4	1	4	1	0
3	1	4	1		4	0
4	1	4	1		4	0
1	2	4	4		4	0
3	2	4	2		4	0
1	1	1	4	2	1	0
4	1	1	3	2	1	0
1	2	1	2	2	3	0
2	2	1	1	2	4	0
1	2	1	3	2	5	0
1	1	1	1	3	1	0
2	1	1	1	3	5	0
2	1	1	3	3	2	0
3	1	1	4	3	2	0
4	1	1	4	3	1	0
1	1	1	1	3	5	0
4	2	1	4	3	5	0
2	2	1	2		4	0
3	1	2	2	2	2	0
3	1	2	4	2	2	0
4	1	2	2	2	5	0
1	2	2	4	2	4	0
3	2	2	4	2	4	0
3	2	2	4	2	2	0
3	2	2	4	2	5	0
1	2	2	2	2	5	0
3	2	2	4	2	3	0
3	1	2	1	3	4	0
3	1	2	4	3	3	0
4	1	2	2	3	3	0
4	1	2	2	3	5	0
4	1	2	4	3	1	0
1	2	2	4	3	4	0
2	2	2	1	3	2	0
2	1	2	1	4	2	0
4	1	2	1	4	1	0
4	1	2	2	4	1	0
1	2	2	1	4	1	0
2	2	2	1	4	4	0
3	2	2	4	4	3	0
3	2	2	4	4	1	0
4	2	2	1	4	3	0
4	1	3	1	1	2	0
1	1	3	1	2	2	0
1	1	3	2	2	4	0
1	1	3	2	2	2	0
1	1	3	2	2	3	0
1	1	3	4	2	4	0
2	1	3	2	2	3	0
2	1	3	4	2	4	0
2	1	3	4	2	4	0
4	1	3	4	2	3	0
1	2	3	1	2	4	0
1	2	3	4	2	2	0
2	2	3	1	2	2	0
2	2	3	1	2	2	0
2	2	3	1	2	2	0
2	2	3	2	2	3	0
2	2	3	4	2	4	0
3	2	3	1	2	1	0
4	2	3	4	2	4	0
2	1	3	4	3	5	0
1	2	3	1	3	4	0
1	2	3	2	3	2	0
1	2	3	4	3	4	0
2	2	3	4	3	5	0
3	2	3	1	3	4	0
3	2	3	4	3	3	0
4	2	3	4	3	3	0
2	2	3	4	3	5	0
3	2	3	1	3	5	0
2	1	3	4	4	4	0
1	2	3	1	4	2	0
3	2	3	2	4	5	0
4	2	3	1	4	2	0
4	2	3	1	4	3	0
4	2	3	2	4	4	0
4	2	3	2	4	1	0
1	2	3	2	4	5	0
4	2	3	1	4	5	0
1	1	3	3		4	0
1	1	3	4		4	0
3	1	3	1		4	0
3	1	3	4		4	0
3	1	4	1	2	2	0
4	1	4	4	2	4	0
1	2	4	2	2	2	0
1	2	4	4	2	2	0
3	2	4	1	2	2	0
4	2	4	4	2	2	0
1	1	4	1	3	4	0
1	1	4	2	3	4	0
2	1	4	1	3	2	0
2	1	4	2	3	4	0
4	1	4	1	3	4	0
4	1	4	2	3	5	0
4	1	4	4	3	2	0
4	1	4	4	3	3	0
4	1	4	4	3	3	0
1	2	4	2	3	4	0
2	2	4	1	3	3	0
2	2	4	2	3	4	0
2	2	4	4	3	2	0
3	2	4	2	3	4	0
3	2	4	2	3	3	0
3	2	4	2	3	1	0
4	2	4	3	3	3	0
4	2	4	3	3	5	0
4	2	4	4	3	2	0
1	2	4	1	3	5	0
1	1	4	1	4	2	0
3	1	4	4	4	3	0
3	1	4	4	4	3	0
4	1	4	2	4	1	0
4	2	4	2	4	3	0
2	1	4	4		4	0
1	2	4	1		4	0
2	2	4	1		4	0
3	2	4	1		4	0
4	2	4	4		4	0
2	1	1	1	1	2	0
2	1	1	4	1	5	0
1	1	1	1	2	3	0
1	1	1	2	2	1	0
3	1	1	1	2	3	0
3	1	1	3	2	1	0
3	1	1	4	2	2	0
4	1	1	4	2	2	0
1	2	1	1	2	2	0
3	2	1	4	2	5	0
1	1	1	1	3	3	0
2	1	1	2	3	2	0
4	1	1	1	3	5	0
4	1	1	2	3	5	0
3	1	1	2	3	5	0
3	1	1	1	4	3	0
2	2	1	1	4	5	0
1	1	1	4		4	0
3	1	2	4	2	3	0
4	1	2	4	2	1	0
4	1	2	1	2	5	0
4	1	2	1	2	5	0
1	2	2	1	2	2	0
4	2	2	4	2	5	0
1	1	2	4	3	4	0
3	1	2	1	3	3	0
4	1	2	3	3	1	0
4	1	2	4	3	4	0
2	1	2	1	3	5	0
1	2	2	2	3	3	0
1	2	2	4	3	2	0
2	2	2	4	3	4	0
2	2	2	4	3	2	0
3	2	2	2	3	5	0
2	1	2	2	4	1	0
3	1	2	2	4	2	0
4	1	2	2	4	3	0
1	2	2	1	4	4	0
1	2	2	2	4	5	0
2	2	2	4	4	5	0
3	2	2	2	4	3	0
3	1	2	1		4	0
2	2	2	2		4	0
3	1	3	2	2	2	0
4	1	3	3	2	3	0
2	1	3	2	2	5	0
1	2	3	1	2	3	0
1	2	3	2	2	2	0
1	2	3	4	2	2	0
2	2	3	1	2	3	0
2	2	3	2	2	3	0
3	2	3	2	2	3	0
3	2	3	4	2	2	0
3	2	3	4	2	2	0
4	2	3	1	2	1	0
4	2	3	3	2	4	0
1	1	3	1	3	2	0
1	1	3	1	3	5	0
1	1	3	4	3	4	0
2	1	3	1	3	5	0
4	1	3	1	3	3	0
4	1	3	4	3	4	0
4	1	3	4	3	3	0
3	1	3	2	3	5	0
1	2	3	2	3	1	0
1	2	3	2	3	1	0
1	2	3	4	3	3	0
2	2	3	1	3	2	0
2	2	3	4	3	4	0
3	2	3	1	3	2	0
3	2	3	4	3	3	0
4	2	3	1	3	1	0
4	2	3	4	3	2	0
1	2	3	1	3	5	0
2	1	3	3	4	4	0
2	1	3	4	4	2	0
3	1	3	4	4	3	0
4	1	3	1	4	2	0
4	1	3	3	4	1	0
4	1	3	4	4	5	0
1	2	3	1	4	5	0
1	2	3	2	4	5	0
3	1	3	1		4	0
3	1	3	1		4	0
3	1	3	4		4	0
4	1	3	2		4	0
4	1	3	2		4	0
1	2	3	1		4	0
1	2	3	2		4	0
1	2	3	4		4	0
3	2	3	1		4	0
3	2	3	2		4	0
1	1	4	3	2	2	0
1	1	4	4	2	3	0
2	1	4	4	2	4	0
4	1	4	1	2	4	0
4	1	4	1	2	4	0
4	1	4	1	2	5	0
4	1	4	2	2	2	0
2	1	4	1	2	5	0
1	2	4	4	2	2	0
2	2	4	1	2	3	0
2	2	4	2	2	4	0
2	2	4	3	2	2	0
2	2	4	4	2	4	0
[truncated: 1,968 more rows]

## Sheet: total serum protein
Note: gender (1: male, 2: female);frequency (1: 1-6, 2: 7-11, 3:12-16, 4:≥17); Blood type (A: 1, B: 2, AB: 3, O: 4);BMI (1:≤18.4, 2:18.5-23.9, 3:24-27.9, 4:≥28); Age (1:18-29, 2:30-39, 3:50-59, 4:60); Area (1:Shandong , 2:Jiangxi , 3:Hubei , 4:sichuan, 5:Ningxia ); Serum calcium: 1: below normal, 0 :normal
frequency	gender	age	blood type	BMI	region	total serum protein
1	1	1	4	2	3	1
2	1	3	4	2	1	1
3	1	3	3	2	1	1
2	1	1	1	3	1	1
2	2	1	3	4	1	1
4	2	4	2	3	3	1
2	1	1	1	3	1	1
3	1	4	1	4	1	1
3	1	4	4	2	1	1
4	2	3	2	2	3	1
4	1	4	1	3	1	1
2	2	3	1	3	1	1
2	1	1	2	3	1	1
2	1	1	4	3	1	1
3	2	2	1	4	1	1
3	2	3	1	2	1	1
2	2	3	2	4	1	1
3	2	1	4	3	1	1
3	1	3	1	3	1	1
3	2	2	2	4	1	1
2	2	1	4	3	1	1
2	1	3	2	2	1	1
3	2	4	3	2	1	1
4	1	4	1	2	3	1
2	2	4	1	3	3	1
3	2	4	2	3	1	1
2	1	3	4	3	1	1
3	1	3	1	2	1	1
2	2	3	3	3	1	1
2	1	4	1	3	3	1
3	1	2	1	3	1	1
4	1	2	4	4	3	1
2	2	1	4	4	1	1
1	2	3	1	2	1	1
2	1	4	2	2	1	1
3	1	4	3	2	3	1
2	2	2	2	3	1	1
2	1	2	2	2	1	1
3	1	1	4	2	1	1
3	2	2	2	4	1	1
3	1	1	1	1	3	1
2	2	2	1	3	1	1
2	1	3	2	2	1	1
2	1	3	4	2	1	1
3	1	4	4	4	1	1
3	1	2	2	1	1	1
2	2	3	2	3	1	1
4	1	4	4	2	3	1
2	2	3	4	2	1	1
3	2	1	2	3	1	1
2	1	3	2	2	1	1
2	2	3	1	2	1	1
3	2	3	4		4	1
3	1	1	4	4	1	1
2	2	2	2	3	1	1
3	1	4	1	2	1	1
2	2	1	4	3	2	1
2	1	2	2	2	1	1
2	2	2	2	4	1	1
3	1	2	4	4	1	1
4	1	3	1	3	3	1
3	1	1	4	2	1	1
3	1	2	4	2	1	1
3	2	2	2	3	1	1
2	1	4	2		4	1
2	1	2	2	4	2	1
3	1	4	1	2	4	1
3	2	2	2	2	1	1
2	1	4	1	4	1	1
3	1	3	3	3	1	1
3	1	1	4	2	1	1
2	2	2	1	2	3	1
2	1	3	2	2	3	1
3	1	1	3	3	1	1
2	2	3	2	4	1	1
4	2	4	4	3	2	1
2	1	3	3	2	2	1
2	1	4	4		4	1
1	2	3	1	3	3	1
2	1	1	1	2	1	1
2	2	2	4	2	1	1
4	1	3	3	4	3	1
4	1	4	2	3	1	1
2	2	4	4	2	3	1
3	2	4	4	4	1	1
4	1	4	3	2	3	1
2	1	2	2	4	1	1
4	2	4	4	3	2	1
4	1	4	1	2	3	1
3	2	2	1	3	1	1
3	2	3	1	3	1	1
2	2	3	3	2	1	1
2	1	3	1	4	1	1
2	1	2	3	3	1	1
3	1	2	1	2	1	1
3	2	3	4	3	1	1
4	1	2	1	2	2	1
3	1	2	1	3	1	1
2	2	2	4	3	3	1
3	1	3	4	3	2	1
2	2	3	4	4	1	1
1	2	3	4	3	3	1
3	1	3	1	3	3	1
2	2	2	1	3	1	1
1	2	2	1	2	1	1
2	2	3	2	2	1	1
2	2	1	1	3	1	1
2	1	3	4	3	1	1
4	1	4	2	2	3	1
3	1	1	4	3	1	1
2	2	2	1	4	1	1
2	2	3	4	2	2	1
4	2	3	4	3	3	1
2	1	4	2	2	1	1
3	2	1	4	3	1	1
2	2	1	4	4	1	1
3	1	3	2	4	1	1
4	2	4	1	2	3	1
3	2	2	2	3	1	1
2	2	4	2	3	2	1
3	1	4	4		4	1
3	2	2	3	4	1	1
2	1	3	4	3	3	1
2	1	4	4	2	2	1
1	2	4	4	4	3	1
3	2	2	3	4	1	1
2	2	2	4	2	1	1
2	1	2	2	3	1	1
2	2	3	2	4	1	1
3	2	3	1	2	2	1
1	1	4	1	3	3	1
3	1	1	3	3	1	1
2	1	2	1	3	1	1
2	2	3	2	4	1	1
4	1	3	4	3	2	1
4	1	4	2	3	3	1
3	2	3	2	3	1	1
2	2	3	4	4	1	1
3	2	4	4	2	2	1
4	1	4	2	2	3	1
3	2	3	2	3	1	1
4	1	3	2	3	2	1
4	2	3	2	2	3	1
3	1	1	2	3	1	1
3	1	2	4	4	1	1
2	1	2	4	2	1	1
4	1	2	1	4	2	1
2	2	3	4		4	1
2	2	3	1	4	1	1
2	2	4	2	3	1	1
2	2	2	4	4	1	1
2	2	4	1	4	1	1
4	2	4	4	2	2	1
3	2	2	2	4	1	1
1	1	3	2	4	1	1
4	2	3	2	2	2	1
3	1	4	4	2	2	1
2	2	1	1	2	1	1
2	1	1	1	4	1	1
3	1	2	1	3	1	1
2	1	2	1	3	3	1
2	1	1	2	4	1	1
2	1	1	1	2	3	1
2	2	3	4	4	1	1
2	1	3	2	2	3	1
3	1	4	4	2	1	1
2	2	4	1	3	5	1
2	1	4	1	3	1	1
2	2	4	4	4	1	1
2	2	4	4	4	1	1
3	1	1	2	3	1	1
4	2	4	4	2	1	1
3	2	1	2	4	1	1
3	2	1	4	4	1	1
3	1	2	1	3	1	1
2	2	3	4	3	1	1
2	2	3	2	4	1	1
4	1	4	2	4	1	1
2	1	1	4	4	1	1
4	1	3	1	2	2	1
2	2	2	1	3	3	1
2	2	3	2	2	1	1
4	2	4	2	2	3	1
2	2	1	2	3	1	1
2	1	2	2	3	3	1
3	2	3	1	3	1	1
2	1	3	2	4	1	1
1	2	3	4	3	3	1
1	1	3	2	3	3	1
2	2	1	2	3	1	1
1	2	1	1	2	1	1
2	2	2	4	3	1	1
2	1	2	2	3	1	1
2	2	2	2	3	1	1
2	2	3	2	3	2	1
3	1	3	4	3	2	1
1	2	4	1	3	2	1
1	2	4	1	2	3	1
2	1	1	4	3	1	1
2	2	3	1	4	1	1
1	2	3	3	3	1	1
3	1	3	1	2	3	1
4	2	4	4	4	1	1
3	2	4	2	2	3	1
2	2	4	3	2	3	1
2	1	1	1	2	1	1
1	2	2	2	2	1	1
4	1	2	4	4	2	1
4	1	3	1	3	2	1
2	1	4	4	2	3	1
2	2	4	3	3	3	1
4	2	3	2	2	3	1
4	2	3	1	3	3	1
2	2	4	4	3	1	1
4	1	4	4	3	3	1
2	1	1	4	2	2	1
1	2	1	2	3	1	1
1	1	3	2	4	1	1
3	2	4	2		4	1
2	1	4	1	2	1	1
2	1	4	4	4	1	1
4	2	4	2	3	3	1
3	1	1	2	4	1	1
3	2	1	1	3	5	1
3	2	2	1	2	1	1
3	1	3	2	3	1	1
1	1	3	4	2	2	1
2	2	3	4	2	3	1
1	2	3	1	2	3	1
2	2	4	1	4	4	1
1	1	2	2	3	1	1
2	1	3	1	3	3	1
1	1	3	1	4	3	1
3	1	4	1	4	1	1
3	1	1	4	3	1	1
2	2	3	2		4	1
3	1	3	4	4	1	1
1	2	3	4	2	2	1
3	2	1	2	2	1	1
2	1	1	4	2	1	1
3	2	3	2	2	2	1
2	2	3	1		4	1
4	1	3	4	4	2	1
2	1	4	1	3	1	1
3	1	4	4	2	3	1
2	2	3	2	2	1	1
3	2	3	4	1	2	1
1	1	3	4	2	3	1
1	2	3	2	2	3	1
2	2	4	1	3	1	1
2	1	1	2	4	1	1
1	1	1	1	1	3	1
3	2	2	2	2	1	1
2	2	2	1	3	1	1
4	1	2	3	3	3	1
2	2	3	4	3	1	1
2	2	4	2		4	1
1	2	4	1	2	1	1
4	2	4	1	2	3	1
1	1	4	1	3	3	1
3	1	1	2	4	1	1
1	1	1	2	2	3	1
2	1	2	4	4	1	1
1	1	2	1	3	3	1
2	1	3	2		4	1
4	1	3	1		4	1
2	2	3	2	4	1	1
3	1	3	4	4	1	1
1	1	3	2	3	3	1
2	1	1	4	2	1	1
2	2	1	4	3	1	1
3	2	2	1	3	1	1
1	2	3	3	2	1	1
2	1	3	2	3	1	1
4	2	3	1	2	3	1
3	2	4	1		4	1
4	2	4	4	3	2	1
3	2	2	4	3	3	1
3	1	2	4	4	1	1
1	2	2	2	3	1	1
2	1	2	1	2	3	1
2	1	3	2	2	1	1
3	2	3	2	3	1	1
2	2	3	1	2	2	1
2	2	3	4	3	3	1
4	2	4	4	2	3	1
4	2	4	4	3	3	1
3	1	4	2	4	3	1
4	2	3	1	2	3	1
1	1	4	3	3	1	1
1	2	4	3	3	1	1
3	1	1	4	2	1	1
2	1	1	4	3	1	1
2	1	3	4	3	1	1
2	2	4	1	3	1	1
3	1	4	4	3	1	1
2	1	1	3	2	2	1
2	1	2	4	3	2	1
3	2	2	4	2	2	1
3	1	2	3	3	2	1
4	2	2	2	2	3	1
2	1	1	2	3	1	1
2	1	2	4	2	1	1
3	2	2	3	2	2	1
2	1	3	1	3	2	1
4	1	4	3	2	3	1
3	1	4	2	3	1	1
2	2	4	4	3	1	1
1	2	4	2	2	2	1
2	1	2	1	2	1	1
2	2	2	1	2	1	1
2	2	3	2	4	1	1
3	1	3	2	2	3	1
4	2	4	1	3	3	1
2	1	4	4	3	3	1
2	1	1	4	3	1	1
2	1	1	1	2	1	1
2	2	2	4	3	3	1
4	2	3	1	3	1	1
4	1	3	4	2	4	1
4	1	4	4	3	1	1
3	1	4	4	3	2	1
2	1	1	1	2	2	1
2	2	2	4	3	1	1
2	1	3	3	2	2	1
4	2	3	1	4	3	1
4	2	4	4	3	2	1
4	2	4	4	4	2	1
2	2	1	1	2	2	1
2	1	1	1	3	2	1
2	2	1	2	3	1	1
3	1	2	4	2	1	1
2	2	2	3	3	1	1
3	1	2	4	3	1	1
4	2	2	1	2	3	1
2	1	3	2	3	1	1
3	2	3	1	2	2	1
3	1	4	4		4	1
3	2	4	2	2	1	1
4	1	4	2	4	3	1
2	1	1	1	2	1	1
2	1	1	1	3	1	1
2	2	2	2	2	3	1
2	1	3	4		4	1
2	1	3	1	3	1	1
4	1	3	1	2	2	1
2	2	3	1	3	2	1
3	2	3	1	3	3	1
2	1	4	2	4	1	1
4	2	4	2	3	1	1
4	2	4	4	2	2	1
4	2	4	4	2	5	1
3	1	1	1	2	1	1
2	1	1	2	4	1	1
2	2	1	4	3	1	1
4	1	2	2	2	1	1
3	2	2	4	4	1	1
2	2	2	1	3	3	1
3	1	3	2	3	2	1
4	2	4	3	3	1	1
3	1	1	1	3	2	1
4	2	2	2	2	5	1
2	1	2	3	4	1	1
2	1	2	3	3	3	1
2	2	2	4	3	3	1
3	2	4	4	3	2	1
2	1	4	4	2	3	1
4	2	4	4	3	3	1
4	2	4	1	3	3	1
4	2	3	4	3	3	1
2	2	3	1	4	3	1
4	2	4	1	3	2	1
2	1	4	1	3	2	1
2	2	1	4	4	1	1
1	2	2	2	2	3	1
2	2	3	2	3	2	1
2	1	1	3	3	1	1
3	1	2	2	2	1	1
4	2	2	1	3	1	1
2	1	2	2	2	1	1
1	2	2	2	2	2	1
3	1	3	1		4	1
1	1	3	2	4	1	1
2	2	3	4	2	3	1
1	1	4	1	3	3	1
3	2	1	2	3	1	1
2	2	2	2	3	1	1
3	2	2	2	4	2	1
4	2	3	4	4	3	1
4	1	4	1	2	3	1
1	2	4	4	2	5	1
3	1	2	4	3	1	1
3	1	2	2	4	1	1
2	1	3	2	2	2	1
4	2	3	1	2	2	1
3	1	3	3	2	2	1
4	2	4	1	2	2	1
4	2	4	4	4	3	1
1	1	3	4	4	1	1
3	2	3	1	2	2	1
4	2	3	4	4	2	1
4	1	4	4	3	3	1
2	2	4	1	2	2	1
2	1	4	4	2	2	1
3	2	4	2	2	2	1
4	2	4	1	3	2	1
4	1	2	4	4	2	1
3	1	2	1	4	3	1
2	2	3	4	3	1	1
4	1	3	4	2	2	1
3	1	3	2	4	5	1
2	2	4	4	4	1	1
4	1	4	4	3	2	1
4	2	4	1	1	3	1
3	1	4	4	2	3	1
1	1	1	4	2	1	1
1	1	1	4	2	3	1
3	1	2	2	3	4	1
2	2	2	2	4	1	1
3	2	3	4		4	1
4	2	3	4	4	1	1
4	1	3	4	2	2	1
4	1	3	4	3	2	1
4	1	3	2	2	3	1
4	2	3	2	3	3	1
2	2	1	2	3	1	1
2	1	1	3	3	5	1
2	1	2	3	3	3	1
4	1	2	4	3	3	1
1	2	2	2	3	3	1
3	2	3	4	3	1	1
1	2	3	1	2	2	1
3	2	3	4	3	2	1
3	2	3	3	3	3	1
4	2	4	1	2	2	1
3	2	4	4	2	2	1
4	2	4	4	2	2	1
4	1	4	3	2	5	1
3	1	1	1	1	1	1
3	2	1	2	2	1	1
2	2	3	1		4	1
4	2	3	2	2	2	1
4	2	3	4	2	2	1
3	1	3	1	3	2	1
2	2	3	4	3	2	1
4	2	3	2	2	3	1
1	2	4	2	3	1	1
4	2	4	4	2	5	1
3	1	2	1	3	1	1
1	1	2	1	3	1	1
3	1	2	2	3	3	1
3	2	3	4	3	2	1
4	1	3	4	2	3	1
2	1	3	4	2	3	1
4	2	3	2	2	3	1
2	1	4	1		4	1
1	1	4	2	3	2	1
1	1	4	2	2	3	1
4	1	4	4	2	3	1
3	1	4	2	3	3	1
3	2	4	1	2	5	1
1	1	1	2	2	1	1
3	1	1	4	2	1	1
4	1	1	2	3	5	1
2	1	2	2	2	2	1
3	2	3	2	3	1	1
1	2	3	4	2	1	1
3	1	3	1	2	2	1
1	2	3	1	3	2	1
2	2	3	2	3	2	1
2	2	3	3	3	3	1
2	2	4	2	3	1	1
3	1	2	2	3	1	1
3	1	2	1	4	1	1
1	2	2	4	2	2	1
2	1	3	2	3	2	1
2	1	3	2	3	1	1
4	1	3	3	3	2	1
4	2	3	4	2	3	1
2	1	3	2	2	3	1
2	1	1	1	2	1	1
1	1	1	4	4	1	1
2	1	2	2	2	1	1
3	2	2	4	2	5	1
4	1	2	1	2	1	1
1	1	2	2	3	1	1
1	1	3	4	3	3	1
3	2	3	4	3	3	1
4	2	4	2	3	3	1
1	2	4	4	2	2	1
4	2	4	2	3	2	1
1	1	4	4	2	3	1
2	1	1	4	2	1	1
2	2	3	2		4	1
4	2	4	4	2	2	1
2	2	4	4	3	1	1
2	2	3	3	2	3	1
1	1	3	4	3	3	1
1	2	4	1	2	2	1
4	1	4	1	4	3	1
3	1	1	1	4	1	1
3	1	2	4	2	3	1
4	2	2	4	3	3	1
2	1	3	2		4	1
1	2	3	4	3	2	1
2	2	3	1	3	3	1
4	1	4	4	2	3	1
2	2	1	1	3	2	1
2	1	1	3	3	3	1
2	1	2	2	4	1	1
1	1	2	1	4	1	1
1	1	2	4	2	3	1
2	1	3	4	3	1	1
3	2	3	3	2	2	1
4	1	4	4	3	4	1
3	2	4	1	2	5	1
4	1	4	1	2	2	1
1	2	4	1	2	3	1
2	1	1	1	2	2	1
1	2	1	2	1	3	1
2	1	2	1	2	2	1
2	2	2	1	3	1	1
4	1	3	1	3	1	1
3	1	3	1	2	2	1
3	2	3	2	2	2	1
3	1	3	1	4	2	1
4	2	3	4	4	2	1
2	1	1	3	2	1	1
2	1	1	2	4	1	1
2	1	2	1	2	1	1
2	2	3	4	2	3	1
3	2	3	2	2	3	1
4	1	4	2	2	1	1
4	2	4	1	3	2	1
2	1	4	1	3	2	1
4	2	4	1	2	3	1
1	1	4	2	2	3	1
4	1	1	3	3	2	1
2	1	2	4	2	1	1
1	2	2	1	3	3	1
2	1	2	2	4	5	1
4	2	4	1	2	1	1
3	2	4	4	2	2	1
2	2	4	4	3	3	1
1	1	1	2	2	1	1
2	1	1	1	1	3	1
3	1	2	2		4	1
4	1	3	4	2	3	1
2	1	3	4	3	1	1
2	2	3	1	2	1	1
3	2	3	4	2	1	1
3	2	4	2		4	1
4	2	4	4	3	1	1
4	1	4	4	3	2	1
4	1	4	2	3	2	1
3	1	4	3	3	2	1
4	2	4	4	2	3	1
1	1	1	2	4	3	1
1	2	2	3	2	3	1
1	1	2	2	2	3	1
4	1	3	4	3	2	1
4	2	3	2	2	3	1
3	1	3	1	3	3	1
2	1	3	2	3	3	1
4	2	4	2	3	3	1
2	1	1	3	2	1	1
2	2	1	4	2	2	1
4	1	2	4	2	2	1
1	1	2	4	2	3	1
4	1	3	1		4	1
3	2	4	4	2	2	1
4	2	4	2	3	2	1
4	2	4	4	3	5	1
3	1	2	1	4	3	1
3	1	2	4	2	2	1
2	1	3	1	2	2	1
3	1	3	4		4	1
3	1	3	1	3	1	1
4	1	3	4	3	2	1
4	1	3	4	4	3	1
4	2	3	4	4	5	1
4	1	4	4		4	1
4	1	4	1		4	1
4	2	4	2	2	1	1
2	2	4	2	4	3	1
3	1	1	2	4	1	1
2	2	2	2	4	1	1
3	1	2	4	3	2	1
3	2	2	2	2	3	1
3	2	3	2	3	4	1
1	1	3	1	4	1	1
2	2	3	2	4	1	1
3	2	3	3	2	2	1
3	1	3	2	2	2	1
2	2	3	4	3	2	1
1	1	3	2	4	2	1
1	2	3	1	2	3	1
3	2	4	2		4	1
2	1	4	1		4	1
4	2	4	1	3	1	1
3	2	4	1	3	4	1
4	1	4	1	3	1	1
3	1	4	2	4	1	1
3	2	4	4	3	2	1
4	1	2	1	2	4	1
4	2	2	1	3	5	1
1	2	2	1	3	1	1
2	1	2	4	3	3	1
2	1	3	2		4	1
3	2	3	4		4	1
4	1	3	3	4	4	1
3	1	3	4	3	2	1
3	1	4	1	3	4	1
3	1	4	2	3	1	1
4	1	4	2	4	1	1
2	1	1	4	2	2	1
2	2	2	2	4	1	1
2	1	2	4	3	2	1
2	2	3	2	3	4	1
2	2	3	4	2	2	1
1	2	3	1	3	3	1
3	1	4	2	2	3	1
3	2	1	2	4	1	1
1	1	1	4	2	3	1
2	2	2	1	2	1	1
2	2	2	1	4	1	1
3	2	3	2	2	2	1
4	1	3	1	3	3	1
1	1	3	4	2	1	1
2	2	4	4		4	1
3	1	4	4	2	4	1
3	1	4	1	4	2	1
1	2	4	1	2	3	1
2	1	2	4	3	1	1
3	1	2	4	3	1	1
2	1	2	4	2	1	1
4	2	2	4	2	2	1
1	1	2	2	3	2	1
4	2	3	4	2	2	1
4	2	3	4	2	2	1
2	2	4	2		4	1
4	2	4	4	4	1	1
2	2	4	2	3	1	1
1	1	4	1	4	2	1
3	2	4	2	3	5	1
4	2	4	3	3	5	1
2	2	1	4	2	1	1
2	1	1	2	3	1	1
1	2	2	2	2	4	1
2	2	2	3	4	1	1
2	2	2	4	1	3	1
3	2	3	2	3	3	1
4	1	3	1	2	1	1
2	1	3	4	2	4	1
1	1	3	2	2	3	1
2	1	3	1	3	3	1
2	1	4	1	4	3	1
2	2	4	2	2	5	1
4	2	4	1	3	5	1
4	2	4	4	2	2	1
4	2	4	4	3	3	1
2	2	1	2	3	1	1
3	1	1	1	3	1	1
2	1	1	4	4	1	1
2	1	1	1	2	3	1
3	1	2	2	2	1	1
3	2	2	1	4	1	1
1	2	2	1	2	2	1
2	1	3	4	3	2	1
2	2	3	1		4	1
3	2	4	2		4	1
4	1	4	2	4	3	1
3	1	4	1	3	5	1
3	1	1	1	2	3	1
3	2	1	4	4	1	1
1	1	1	1	2	3	1
3	1	2	2	3	1	1
2	1	2	1	4	2	1
3	1	3	1		4	1
4	1	3	1	3	1	1
3	1	3	1	3	1	1
4	1	3	2	3	2	1
3	1	3	1	3	2	1
4	2	3	1	4	2	1
3	2	4	1	2	2	1
1	2	4	2	4	1	1
2	1	1	1	2	1	1
2	1	1	2	3	1	1
4	1	1	2	4	1	1
2	2	2	1	3	5	1
2	2	2	4	3	1	1
1	2	2	2	3	2	1
4	2	3	1	2	4	1
4	2	3	4	3	5	1
4	1	3	1	3	1	1
1	2	3	3	3	1	1
4	2	3	3	4	1	1
4	2	3	3	4	1	1
1	2	3	4	2	2	1
3	2	3	4	2	2	1
3	2	3	1	2	2	1
2	1	4	2	4	2	1
4	2	4	3	3	3	1
2	1	4	4	4	1	1
4	2	4	1	2	2	1
2	1	4	1	3	2	1
4	2	4	3	3	3	1
2	1	1	4	3	2	1
3	1	1	2	4	1	1
4	2	1	4	2	5	1
1	1	1	4	1	3	1
2	1	2	2	2	1	1
2	1	2	4	2	1	1
3	2	2	2	3	2	1
4	2	3	4	2	5	1
3	2	3	2	4	1	1
3	1	3	1	3	2	1
4	2	3	1	3	2	1
2	1	3	2	4	3	1
4	1	4	2	4	1	1
2	1	4	2	2	4	1
2	1	4	1	4	3	1
2	2	1	2	4	1	1
1	1	1	4	4	2	1
2	2	2	4	4	1	1
3	1	2	1	2	2	1
2	2	3	1		4	1
2	2	3	3	2	3	1
4	2	3	4	4	1	1
2	2	3	1	2	2	1
4	1	4	1	2	4	1
4	2	4	4	2	1	1
4	2	4	4	2	1	1
4	2	4	3	2	2	1
2	1	1	2	2	2	1
2	2	1	2	2	5	1
3	1	2	1		4	1
2	1	2	4	3	1	1
3	1	2	1	3	2	1
1	2	2	2	2	3	1
3	2	3	1		4	1
4	1	3	3	2	3	1
4	2	3	4	3	2	1
1	1	3	4	3	2	1
4	1	3	4	2	3	1
3	1	3	2	3	3	1
3	2	3	3	2	5	1
2	2	4	2	2	2	1
1	1	1	1	1	1	1
1	1	2	4	2	5	1
2	2	3	1	3	3	1
3	1	3	4	2	1	1
4	2	3	4	2	2	1
4	2	3	1	2	3	1
2	2	4	1	2	3	1
1	2	4	3	3	3	1
4	2	4	2	2	5	1
3	1	1	1	2	1	1
2	1	1	4	2	1	1
2	2	1	1	2	2	1
1	1	2	3	3	1	1
3	2	3	4		4	1
2	1	3	2	4	2	1
3	1	3	2	2	3	1
4	1	3	1	4	3	1
4	2	4	4	3	3	1
1	1	4	1	3	4	1
4	1	4	4	3	5	1
4	1	2	1	2	2	1
2	2	3	3	2	2	1
2	1	3	4	3	1	1
3	2	3	2	2	2	1
3	2	3	4	3	2	1
2	1	3	2	4	2	1
4	1	3	1	2	3	1
2	2	3	3	3	3	1
2	2	3	4	2	5	1
4	2	4	3	2	4	1
4	2	4	4	4	1	1
1	1	1	1	3	3	1
4	2	2	4	2	3	1
4	2	2	4	2	1	1
1	1	2	3	2	2	1
1	1	2	2	2	3	1
1	2	3	2	4	1	1
4	2	3	2	2	2	1
2	1	3	2	3	2	1
3	1	3	3	1	3	1
2	2	4	4	4	1	1
4	2	4	4	3	4	1
4	2	4	2	2	1	1
4	1	4	1	3	1	1
4	2	4	1	2	2	1
3	1	4	2	2	2	1
2	1	1	4	1	5	1
2	1	1	2	3	1	1
4	2	2	1	3	5	1
1	2	2	4	2	1	1
3	2	2	4	3	3	1
2	2	3	4		4	1
2	2	3	1		4	1
4	2	3	2	2	1	1
3	2	3	2	3	1	1
3	2	3	3	3	2	1
4	2	4	2	3	1	1
3	2	4	3	3	2	1
4	1	1	3	3	1	1
1	2	1	1	2	3	1
3	1	2	2	2	1	1
4	1	3	1	2	2	1
3	1	3	2		4	1
4	1	3	4	3	1	1
3	1	3	1	3	1	1
4	1	3	3	3	2	1
4	1	3	4	2	3	1
3	2	3	2	2	3	1
3	1	4	1	3	2	1
3	1	4	1		4	1
3	2	4	4	2	2	1
2	1	4	1	2	2	1
2	1	4	2	2	3	1
3	1	1	1	3	1	1
1	1	2	2	4	3	1
3	1	2	4	3	4	1
2	1	2	4	3	1	1
4	1	2	2	3	1	1
1	2	2	2	4	1	1
1	2	2	1	2	2	1
1	1	2	1	4	5	1
2	2	3	4	3	3	1
3	1	3	1	2	2	1
2	1	3	1	3	3	1
4	2	3	2	4	3	1
3	2	3	2	4	5	1
4	2	4	4	3	2	1
1	2	4	2	3	2	1
3	1	1	2	2	5	1
1	2	2	4	2	1	1
4	1	2	3	3	1	1
1	1	2	1	4	3	1
3	2	3	4	2	2	1
3	2	3	1	3	5	1
1	2	3	1	2	1	1
2	2	3	2	2	2	1
3	2	3	3	2	2	1
2	1	3	2	2	2	1
2	2	3	4	3	2	1
4	1	4	2	2	3	1
4	2	4	2	2	4	1
4	2	4	2	3	4	1
4	2	4	1	4	4	1
4	2	4	2	1	2	1
2	2	1	2		4	1
2	1	1	4	3	1	1
4	1	1	2	2	5	1
3	2	2	1	2	2	1
2	2	3	1	2	2	1
4	1	3	4	3	3	1
4	2	3	1	3	3	1
3	2	3	2	2	1	1
4	1	3	4	3	2	1
1	1	3	3	4	3	1
4	2	3	1	3	5	1
4	1	4	3		4	1
3	1	4	4		4	1
3	1	4	2		4	1
4	1	4	2	2	3	1
4	2	4	2	4	1	1
3	1	4	2	4	1	1
4	2	4	2	3	1	1
4	2	4	2	4	3	1
4	2	4	4	3	5	1
3	2	1	2	3	1	1
1	1	1	4	4	1	1
1	2	1	2	3	1	1
4	2	1	1	4	5	1
4	1	2	1		4	1
1	2	2	4	2	2	1
1	2	2	1	3	2	1
1	1	2	1	4	2	1
2	2	2	2	3	5	1
2	1	3	4		4	1
3	2	3	4	3	5	1
1	2	3	4	3	1	1
2	1	3	3	4	1	1
1	2	3	4	3	3	1
2	1	3	3	3	3	1
2	2	4	4	3	2	1
2	1	4	1		4	1
4	1	4	1	3	3	1
2	1	4	2	2	4	1
1	2	4	1	2	4	1
4	2	4	1	4	4	1
4	1	4	2	3	1	1
4	1	4	1	3	1	1
4	1	4	4	2	3	1
4	2	4	2	3	3	1
4	1	1	4	2	2	1
2	1	1	4	2	2	1
3	1	1	2	2	1	1
4	2	1	2	1	5	1
3	2	1	3	4	5	1
4	1	1	4	3	5	1
4	2	2	4	3	1	1
4	1	2	1	2	5	1
2	2	2	4	4	2	1
2	1	3	2		4	1
4	1	3	1	3	3	1
4	2	3	2	2	1	1
2	1	3	1	2	4	1
4	1	3	1	4	4	1
1	1	3	1	2	3	1
4	2	3	4	3	5	1
3	1	4	2	4	3	1
4	2	4	2	2	1	1
2	1	4	1	3	3	1
4	2	4	1	4	5	1
4	1	1	4	2	2	1
2	2	1	1	2	2	1
3	1	1	1	2	5	1
3	1	1	2	2	1	1
2	1	1	2	2	1	1
2	1	1	3	2	3	1
1	1	1	2	2	3	1
3	1	2	1	4	3	1
3	2	2	4	2	1	1
2	2	2	3	3	1	1
4	1	2	2	2	5	1
2	1	2	2	3	3	1
3	2	3	4	4	2	1
4	1	3	4	2	3	1
1	1	3	4	2	4	1
2	2	3	2	3	4	1
3	1	3	1	3	5	1
4	2	4	4	2	2	1
4	2	4	3	3	1	1
2	2	4	3	4	2	1
3	1	4	4	3	3	1
3	1	1	1	4	4	1
2	1	1	1	2	3	1
2	2	2	2	4	5	1
2	1	2	4	3	1	1
2	1	2	3	4	5	1
1	1	2	2	4	5	1
3	2	3	1	2	3	1
4	1	3	4	4	3	1
1	2	3	1	2	4	1
2	2	3	1	2	4	1
4	2	3	1	3	5	1
4	2	3	4	3	1	1
1	1	3	2	4	1	1
3	1	3	3	4	1	1
4	1	3	1	1	2	1
3	1	3	4	2	2	1
4	1	3	2	3	2	1
4	2	4	1	3	3	1
3	1	4	4	3	4	1
4	2	4	2	2	5	1
3	2	4	1	4	1	1
4	2	4	2	4	5	1
2	2	1	2	2	5	1
3	2	3	3	2	2	1
4	2	3	3	4	1	1
1	1	3	2	4	1	1
3	1	3	2	2	3	1
2	1	4	1		4	1
2	1	4	1	2	4	1
4	2	4	3	4	4	1
3	2	4	4	2	2	1
3	2	4	4	3	2	1
2	2	4	2	2	3	1
2	2	4	4	2	3	1
4	2	4	4	3	3	1
2	1	1	1	2	2	1
4	1	1	4	2	2	1
2	1	1	1	3	3	1
1	1	2	2	2	1	1
2	1	2	2	1	2	1
3	2	3	1	2	3	1
3	1	3	1	4	3	1
1	1	3	1	1	2	1
4	2	3	2	3	2	1
1	1	3	4	3	3	1
4	2	3	1	4	3	1
2	2	4	4	3	1	1
1	2	4	2	3	4	1
3	2	4	1	2	2	1
2	1	4	4	2	2	1
3	2	4	2	2	2	1
2	2	4	4	2	3	1
4	2	4	4	2	3	1
1	2	1	1	3	1	1
4	2	1	2	4	1	1
2	1	1	3	3	2	1
2	1	2	4	2	2	1
1	2	2	2	4	4	1
2	1	2	1	3	5	1
3	2	2	2	3	1	1
4	1	2	4	3	2	1
1	2	3	4	2	5	1
4	1	4	2	2	1	1
4	2	4	1	3	1	1
4	2	4	2	4	1	1
4	2	4	2	3	2	1
1	1	4	1	3	2	1
4	1	4	4	2	3	1
2	1	4	3	3	3	1
3	1	1	3	2	2	1
4	1	1	4	2	1	1
2	1	1	1	4	1	1
4	1	2	1	4	1	1
3	1	2	4	2	4	1
3	1	2	4	3	1	1
2	1	2	4	4	3	1
2	2	3	1	4	1	1
4	2	3	1	2	2	1
3	2	3	4	2	2	1
1	2	3	3	2	2	1
2	1	3	2	2	2	1
3	1	3	2	3	2	1
2	2	3	1	3	2	1
1	2	3	4	3	3	1
3	1	4	1		4	1
4	2	4	3	3	3	1
4	2	4	1	4	3	1
3	1	4	2	3	4	1
1	2	4	1	4	2	1
1	1	4	1	4	5	1
3	1	1	4	3	2	1
2	2	1	1	3	1	1
3	1	1	3	2	1	1
1	1	1	1	3	1	1
1	1	1	4	2	3	1
4	2	2	4	2	1	1
2	1	2	4	4	4	1
4	2	2	2	3	1	1
1	1	2	1	2	2	1
1	1	2	1	3	3	1
4	1	3	4	2	4	1
2	1	3	4	2	3	1
4	2	3	1	3	3	1
1	1	3	1	3	3	1
2	2	3	1	2	5	1
4	2	4	1	3	4	1
4	1	4	1	2	5	1
2	1	1	1		4	1
3	1	1	4	3	5	1
3	1	1	4	2	1	1
2	2	1	1	2	2	1
3	1	1	4	2	3	1
3	1	2	4	2	3	1
2	2	2	4	4	5	1
1	1	2	4	3	1	1
3	2	3	4	2	2	1
4	2	3	1	3	2	1
2	1	3	1		4	1
1	2	3	4	2	4	1
4	1	3	4	2	1	1
3	1	3	1	2	2	1
2	2	3	1	4	3	1
1	2	3	1	4	3	1
3	1	4	1	4	2	1
4	2	4	1	3	3	1
2	1	4	1	4	3	1
4	1	4	1	3	1	1
4	2	4	2	4	1	1
4	2	4	2	2	4	1
3	1	4	1	2	1	1
4	1	4	1	2	1	1
3	2	4	1	2	2	1
1	1	4	1	3	2	1
1	2	1	1	2	3	1
3	1	1	2	2	3	1
2	1	1	2	2	3	1
1	1	1	1	2	3	1
4	1	2	1	3	1	1
2	1	2	3	3	2	1
3	1	2	2	4	2	1
4	2	2	2	3	3	1
4	2	2	4	4	5	1
3	1	3	1		4	1
2	1	3	1		4	1
4	1	3	4	3	3	1
2	1	3	4	2	4	1
1	1	3	1	3	2	1
4	1	4	2	3	2	1
1	2	4	2		4	1
4	2	4	4	3	4	1
4	1	4	3	3	1	1
2	1	4	4	3	2	1
2	1	1	4	4	1	1
3	1	1	3	4	1	1
4	1	1	2	4	5	1
1	1	2	1	3	3	1
1	1	2	1	2	5	1
2	1	2	1	3	2	1
4	1	3	4	2	2	1
3	1	3	1		4	1
3	2	3	2	2	3	1
1	1	3	4	3	3	1
1	2	3	2	2	4	1
4	2	3	3	3	1	1
1	2	3	1	2	2	1
1	2	3	2	3	3	1
3	1	3	2	3	3	1
1	2	3	1	3	3	1
4	1	3	4	3	5	1
3	2	4	1	3	3	1
4	1	4	1	2	4	1
4	2	4	4	3	1	1
4	1	4	2	2	2	1
2	1	1	4	2	2	0
2	1	1	4	2	2	0
3	2	1	2	3	1	0
1	1	1	2	3	3	0
4	1	2	4	3	1	0
2	1	2	2	4	1	0
2	2	3	4		4	0
3	1	3	1		4	0
4	1	3	4	4	3	0
4	1	3	1	3	1	0
1	2	3	2	4	4	0
4	1	3	3	3	1	0
4	2	4	4	2	2	0
1	1	4	1		4	0
1	2	4	1		4	0
4	2	4	2		4	0
1	1	4	2	3	1	0
2	2	4	4	3	4	0
4	1	4	1	3	1	0
1	2	4	1	4	1	0
2	1	4	4	3	2	0
3	2	4	1	3	2	0
4	1	4	2	4	2	0
3	2	4	2	4	2	0
4	1	4	4	2	3	0
2	2	4	1	3	3	0
2	1	1	4	2	2	0
2	1	1	2	3	2	0
3	1	1	4	2	1	0
1	1	1	2	4	1	0
4	1	1	1	3	5	0
2	2	2	2		4	0
4	1	2	1	3	3	0
1	1	2	1	4	3	0
4	2	2	2	4	5	0
2	2	3	1	2	2	0
3	2	3	1	2	2	0
1	1	3	4	3	2	0
4	1	3	4		4	0
1	2	3	4	2	3	0
3	1	3	4	3	3	0
1	2	3	2	2	2	0
1	1	4	3	2	2	0
4	2	4	4	2	2	0
2	2	4	4	2	2	0
2	2	4	1	4	2	0
4	2	4	1		4	0
4	2	4	4	3	3	0
4	1	4	4	3	3	0
4	1	4	2	3	3	0
4	1	4	1	2	4	0
4	1	4	4	3	4	0
3	1	4	1	2	2	0
3	1	4	1	2	3	0
4	1	4	1	4	3	0
2	2	2	2	2	4	0
4	1	2	1	2	5	0
2	2	2	2	3	5	0
4	2	3	4	2	2	0
1	2	3	4	3	2	0
2	2	3	4		4	0
1	1	3	4	3	1	0
2	1	3	4	2	4	0
4	1	3	1	4	3	0
1	1	4	4	2	2	0
3	2	4	1	2	3	0
3	1	4	2	2	3	0
3	2	4	2	3	4	0
2	1	4	1	2	3	0
2	2	1	3	2	1	0
2	1	1	4	2	5	0
3	1	1	4	4	1	0
4	1	2	2	3	2	0
2	2	2	3	3	5	0
3	2	2	3	3	2	0
1	2	2	1	3	3	0
2	2	2	1	3	3	0
2	2	2	2	3	5	0
3	2	3	4	3	2	0
4	2	3	1	4	3	0
4	2	3	1	2	2	0
1	2	3	4	2	3	0
2	1	4	4	2	4	0
4	1	4	2	3	4	0
3	2	4	1	4	4	0
1	2	4	2	2	2	0
3	1	4	4	3	3	0
2	1	4	2	3	3	0
3	2	4	4	4	5	0
2	1	1	1	2	1	0
3	1	1	4	2	2	0
4	1	2	4	4	2	0
4	1	2	2	2	1	0
4	1	2	2	4	4	0
3	1	2	1	2	2	0
4	1	2	2	3	2	0
4	2	2	4	2	3	0
1	1	2	1	3	3	0
3	2	3	2		4	0
1	2	3	4	2	2	0
1	1	3	4	2	2	0
4	1	3	2	3	5	0
3	2	4	1	3	2	0
4	2	4	1	3	3	0
3	2	4	4	3	1	0
3	1	4	4	2	2	0
3	1	4	4	3	3	0
3	1	1	4	1	2	0
4	1	1	2	2	1	0
3	1	1	1	2	4	0
2	1	1	3	2	1	0
3	1	2	4		4	0
3	2	2	3	3	3	0
3	1	2	2	4	3	0
3	1	2	1	4	1	0
3	1	2	3	4	1	0
3	1	2	1	4	3	0
4	2	3	1	2	2	0
2	1	3	3	4	3	0
4	2	3	1	3	1	0
3	1	3	2	3	1	0
4	2	3	4	2	2	0
1	2	3	4	2	2	0
3	1	3	1	2	3	0
3	2	3	2	2	3	0
2	2	3	4	4	3	0
2	1	4	4		4	0
2	1	4	3		4	0
3	1	4	4		4	0
1	2	4	4	2	3	0
1	1	4	2	2	4	0
4	2	4	4	3	1	0
2	1	1	4	2	2	0
2	1	1	3	2	3	0
3	1	1	3	2	5	0
2	2	1	2	3	5	0
1	1	1	4	2	1	0
3	2	2	4	2	2	0
4	1	2	3	4	2	0
3	1	2	4	2	2	0
3	2	3	4	2	2	0
4	2	3	2	2	2	0
4	2	3	2	3	2	0
2	1	3	1		4	0
4	1	3	1	2	3	0
4	2	3	4	3	1	0
2	1	3	4	2	4	0
3	1	3	4	4	4	0
4	2	3	2	2	1	0
3	1	3	2	3	3	0
2	2	4	4	3	4	0
4	2	4	3	2	1	0
4	2	4	4	2	1	0
2	1	4	1	2	2	0
2	1	4	4	2	5	0
2	1	4	4	4	5	0
3	1	1	1	2	2	0
3	1	1	3	2	1	0
1	2	2	3	2	1	0
2	2	2	4	2	2	0
1	1	2	2	3	2	0
2	1	2	2	2	3	0
4	1	2	2	3	5	0
3	1	3	1		4	0
4	2	3	4	3	3	0
3	2	3	1	3	4	0
4	1	3	2	3	1	0
4	1	3	1	3	1	0
4	1	3	1	3	1	0
3	1	3	1	3	2	0
3	1	3	3	3	5	0
4	2	4	4	3	3	0
3	1	4	4	4	2	0
4	2	4	1	4	2	0
3	2	4	4	2	3	0
4	1	4	2	3	3	0
1	1	4	4	3	3	0
4	1	4	2	3	3	0
4	1	4	2	3	5	0
3	1	4	1	3	5	0
2	2	1	1	2	3	0
4	1	2	2	3	3	0
4	1	2	2	3	1	0
4	1	2	2	4	1	0
2	2	2	2	2	2	0
4	2	2	4	4	5	0
1	1	3	4	3	2	0
4	2	3	4	3	1	0
3	1	3	2	2	4	0
4	1	3	4	2	4	0
2	1	3	4	4	4	0
3	2	3	4	4	1	0
3	1	3	1	2	3	0
4	1	3	2	3	3	0
4	2	4	2	4	2	0
4	2	4	4	2	3	0
4	2	4	4	4	3	0
3	1	4	4	4	3	0
3	2	4	1	3	2	0
1	1	4	1	3	2	0
3	2	4	1	2	3	0
1	2	4	1	3	3	0
2	1	4	1	2	5	0
1	1	4	2	3	5	0
4	1	1	4	2	1	0
2	1	1	1	2	1	0
2	1	1	2	3	1	0
1	1	1	2	3	1	0
4	2	2	1	2	2	0
4	1	2	4	2	1	0
2	2	2	2	4	4	0
3	2	2	2	3	5	0
1	1	3	2	2	2	0
2	2	3	3		4	0
4	1	3	2	4	1	0
2	2	3	1	4	4	0
1	2	3	2	3	2	0
2	1	3	4	3	2	0
4	1	4	1	2	2	0
4	2	4	3	2	3	0
2	2	4	1	4	3	0
2	1	4	2	3	4	0
4	2	4	1	4	4	0
4	2	4	1	2	5	0
4	2	4	2	2	5	0
2	2	4	2	2	3	0
1	1	4	4	3	3	0
1	1	4	4	3	3	0
3	2	1	2	2	2	0
1	1	1	1	2	3	0
1	1	1	4	4	1	0
2	2	1	4	2	5	0
1	2	1	2	4	1	0
3	1	2	1		4	0
1	1	2	1	3	3	0
4	1	2	2	2	5	0
2	1	2	1	2	2	0
4	1	2	4	2	3	0
1	1	3	3		4	0
1	2	3	2	4	1	0
2	1	3	1	2	2	0
2	1	4	2	2	2	0
1	1	4	1		4	0
2	1	4	4		4	0
4	1	4	1		4	0
1	1	4	4		4	0
4	1	4	3	3	3	0
4	2	4	1	3	1	0
3	2	4	2	4	4	0
3	2	4	4	3	5	0
3	2	4	4	4	1	0
2	1	4	1	4	3	0
4	2	4	4	2	5	0
3	2	4	3	4	5	0
2	2	1	1	3	5	0
4	1	1	2	3	1	0
1	1	1	1	3	1	0
3	1	2	1	2	2	0
3	1	2	4	3	2	0
3	2	2	4		4	0
1	1	2	1	3	3	0
2	1	2	1	2	4	0
3	2	2	3	3	1	0
1	2	2	2	2	2	0
3	1	2	4	4	5	0
2	2	3	1	2	2	0
2	2	3	4	3	2	0
4	2	3	4	4	1	0
2	1	3	4	4	1	0
4	2	3	3	2	4	0
3	2	3	1	4	4	0
4	1	3	4	3	5	0
4	2	3	4	3	1	0
1	2	3	1	3	3	0
4	2	3	1	4	5	0
3	2	4	2		4	0
4	1	4	1	3	3	0
3	1	4	2	3	4	0
3	2	4	4	3	1	0
3	1	4	4	3	2	0
1	2	4	4	3	2	0
4	2	4	4	3	5	0
4	1	1	1	3	1	0
2	2	2	1	2	2	0
3	2	2	4	4	1	0
4	2	2	3	3	3	0
1	2	2	2	3	3	0
3	2	3	4	3	2	0
3	1	3	2		4	0
2	2	3	2		4	0
3	2	3	2		4	0
1	1	3	4	3	4	0
1	1	3	4	3	4	0
3	2	3	2	3	4	0
2	1	3	4	3	4	0
2	2	3	4	2	5	0
4	2	3	2	3	5	0
1	2	3	4	3	1	0
4	1	3	1	2	3	0
4	2	3	4	3	3	0
3	2	3	1	3	3	0
2	2	3	3	4	3	0
3	1	4	1		4	0
4	2	4	2	4	1	0
4	1	4	2	2	2	0
3	2	4	2	3	3	0
4	1	1	1	4	3	0
1	1	1	2	3	1	0
3	1	1	3	4	1	0
1	1	1	2	2	3	0
4	1	2	1	2	2	0
1	1	2	2	2	1	0
2	1	2	2	4	1	0
4	1	2	1	3	1	0
3	1	2	2	2	2	0
1	2	3	1	2	3	0
3	2	3	2	3	3	0
1	2	3	2	3	3	0
3	2	3	1	4	5	0
4	1	4	2	3	2	0
2	2	4	1		4	0
2	2	4	4	4	3	0
3	1	4	2	3	4	0
4	1	4	1	3	1	0
1	1	4	4	4	1	0
2	2	4	3	2	2	0
1	1	4	2	2	2	0
3	1	1	1	2	3	0
4	1	2	4	2	1	0
4	2	2	4	2	5	0
3	2	2	2	2	1	0
3	2	2	2	2	1	0
4	1	2	1	3	3	0
2	2	3	2	4	2	0
2	1	3	4		4	0
4	1	3	2	4	3	0
1	1	3	2	3	4	0
3	2	3	4	4	5	0
1	1	3	1	3	1	0
1	1	3	2	3	2	0
3	2	4	1		4	0
4	1	4	4	3	1	0
4	1	4	1	2	4	0
4	2	4	3	4	4	0
3	2	4	4	4	4	0
4	2	4	4	4	5	0
1	2	4	2	3	3	0
4	1	4	2	4	3	0
4	2	4	3	4	5	0
4	2	2	4	3	1	0
4	1	2	4	4	1	0
3	1	2	2	4	5	0
2	2	3	1	2	2	0
3	2	3	2		4	0
4	2	3	4	3	3	0
4	1	3	1	3	3	0
3	2	3	3	4	1	0
2	2	3	1	2	2	0
3	1	3	1	3	2	0
1	1	3	4	4	2	0
4	1	3	1	4	3	0
4	1	3	4	3	5	0
1	1	3	2	4	5	0
2	1	3	1	4	5	0
1	1	3	4	4	5	0
4	1	4	4	3	2	0
3	2	4	2	2	3	0
4	1	4	1	2	3	0
2	2	4	4	3	3	0
4	1	4	4	3	3	0
2	2	4	2	2	4	0
4	1	4	4	2	3	0
1	2	4	1	3	3	0
4	2	4	1	2	5	0
4	2	4	2	4	5	0
2	1	1	2	3	2	0
1	1	1	2	2	1	0
1	2	1	4	3	1	0
1	1	1	1	2	5	0
4	1	2	1	2	1	0
4	1	3	2	4	2	0
4	1	3	2		4	0
4	2	3	4	2	1	0
1	2	3	2	2	2	0
3	1	3	1	2	2	0
2	2	3	2	4	3	0
2	2	3	1	3	5	0
3	2	4	2		4	0
4	2	4	2	2	3	0
4	1	4	4	3	4	0
4	2	4	4	3	1	0
3	1	4	3	3	1	0
2	2	4	4	2	2	0
4	1	1	3	3	5	0
4	1	2	3	2	2	0
1	1	2	4		4	0
4	2	2	2	4	5	0
1	1	2	1	2	3	0
1	2	3	4	2	2	0
4	2	3	1	2	2	0
2	1	3	4	3	2	0
4	1	3	1	3	5	0
1	2	3	4	2	1	0
3	2	3	3	3	5	0
4	2	3	4	3	5	0
4	2	4	2		4	0
4	1	4	1	3	3	0
1	2	4	2	4	3	0
4	2	4	2	2	1	0
4	2	4	4	2	1	0
2	1	4	1	2	4	0
4	1	4	1	2	4	0
4	1	4	1	2	4	0
3	2	4	2	2	1	0
4	1	4	3	3	1	0
1	1	4	1	2	5	0
4	1	1	2	4	2	0
2	1	1	1	2	5	0
4	1	1	4	3	5	0
3	2	2	1	3	3	0
3	2	2	3	4	1	0
3	2	2	4	2	5	0
4	1	2	2	4	1	0
2	2	2	2	2	3	0
3	1	2	1	4	5	0
4	1	3	2	1	2	0
3	1	3	1		4	0
1	1	3	1	2	3	0
4	2	3	1	3	1	0
1	2	3	1	2	5	0
3	1	3	2	4	1	0
3	2	3	4	2	2	0
1	2	3	2	3	2	0
3	2	3	4	3	2	0
3	2	3	1	2	5	0
4	2	3	1	3	5	0
4	2	3	4	4	5	0
4	2	3	4	4	5	0
4	2	4	1	4	2	0
4	1	4	1		4	0
1	2	4	1	3	3	0
4	1	4	2	4	1	0
2	1	4	1	2	4	0
4	2	4	4	3	4	0
2	2	4	1	3	5	0
3	2	1	4	3	5	0
1	2	2	1	2	4	0
2	2	2	4	3	3	0
1	1	2	2	3	3	0
1	2	2	4	4	5	0
4	2	3	4	2	2	0
3	1	3	1	4	3	0
2	1	3	1	3	4	0
3	1	3	4	3	4	0
1	2	3	1	3	1	0
3	2	3	1	2	2	0
3	2	4	1	2	2	0
3	2	4	1	2	2	0
3	1	4	4	3	3	0
4	2	4	3	2	1	0
1	2	4	4	2	4	0
3	1	4	4	3	4	0
3	1	4	1	4	1	0
1	2	4	4	2	3	0
2	2	4	2	3	3	0
3	1	1	1	2	2	0
2	2	1	1		4	0
1	1	1	4	2	5	0
3	2	1	1	3	5	0
3	1	1	4	3	2	0
2	1	2	2		4	0
2	1	2	2	3	3	0
3	1	2	4	3	4	0
3	1	2	1	2	2	0
1	1	3	2		4	0
1	2	3	1		4	0
1	2	3	1		4	0
3	2	3	2		4	0
3	1	3	4		4	0
1	1	3	2		4	0
1	1	3	2		4	0
2	1	3	1		4	0
3	2	3	4		4	0
4	2	3	2	3	3	0
1	1	3	2	2	5	0
2	1	3	2	2	3	0
2	2	4	1		4	0
1	2	4	1		4	0
1	2	4	4		4	0
4	1	4	2		4	0
1	1	4	4		4	0
2	2	4	2	4	3	0
4	2	4	1	3	5	0
2	2	4	1	3	1	0
2	1	4	2	3	5	0
3	2	1	1	1	2	0
2	1	1	4	2	2	0
4	1	1	4	3	2	0
2	2	1	2	2	1	0
3	1	1	4	2	4	0
2	2	1	3	3	5	0
2	1	2	2	3	2	0
3	2	2	1	2	4	0
2	2	2	4	3	4	0
1	2	2	4	2	5	0
4	1	2	4	2	1	0
3	1	2	2	2	2	0
1	1	2	4	3	2	0
3	2	2	4	3	5	0
3	2	3	2	2	2	0
2	2	3	4	3	2	0
3	2	3	4	4	2	0
4	2	3	2		4	0
1	1	3	1	2	3	0
4	2	3	3	3	3	0
3	2	3	4	4	3	0
4	2	3	1	2	1	0
4	2	3	1	2	4	0
2	1	3	4	3	5	0
4	2	3	4	3	5	0
3	2	3	1	4	5	0
2	2	3	1	2	2	0
3	1	3	4	2	5	0
1	2	3	4	3	5	0
1	2	3	1	3	5	0
2	2	3	1	3	5	0
3	2	4	1		4	0
4	2	4	3	3	3	0
4	1	4	4	4	5	0
4	1	4	1	3	1	0
2	2	4	3	3	2	0
1	1	4	1	3	3	0
1	1	1	4	1	2	0
3	1	1	3	3	5	0
4	1	1	1	2	1	0
3	1	1	1	3	3	0
3	1	2	4	3	3	0
3	1	2	1	1	1	0
1	1	2	2	2	1	0
3	2	3	1	2	2	0
2	1	3	1	4	2	0
4	2	3	4	4	2	0
2	2	3	4	2	3	0
2	1	3	2	3	3	0
2	1	3	1	3	3	0
4	1	3	2	3	4	0
3	2	3	4	4	4	0
2	2	3	4	2	2	0
4	2	3	4	3	2	0
2	2	3	3	4	2	0
3	2	4	4	2	3	0
2	1	4	1	2	3	0
4	1	4	1	4	4	0
4	2	4	1	2	5	0
3	1	4	3	2	2	0
2	2	4	4	2	3	0
1	2	4	4	2	3	0
2	2	4	1	2	5	0
4	2	4	1	2	5	0
4	1	1	4	3	1	0
3	1	2	4	2	2	0
2	2	2	2	2	2	0
3	1	2	4		4	0
4	2	2	4	2	1	0
2	2	2	1	2	4	0
2	2	2	4	3	4	0
1	2	2	2	2	5	0
2	2	3	4	2	2	0
4	1	3	1	4	2	0
3	2	3	2		4	0
4	1	3	2	2	3	0
3	1	3	2	3	3	0
1	1	3	2	2	4	0
3	2	3	1	3	4	0
3	2	3	4	4	5	0
3	2	3	4	4	5	0
4	2	3	4	3	1	0
1	2	3	1	4	1	0
4	2	3	1	4	3	0
3	2	3	1	3	5	0
3	1	4	4	3	2	0
3	2	4	2	2	3	0
3	2	4	2	4	3	0
4	1	4	2	2	1	0
4	1	4	4	2	4	0
3	1	4	2	3	4	0
4	2	4	2	4	4	0
1	2	4	2	3	5	0
2	1	4	4	3	2	0
2	1	4	4	4	3	0
3	2	4	4	3	5	0
4	2	4	4	4	5	0
1	1	1	1	3	3	0
1	1	1	4	2	1	0
1	1	1	2	2	1	0
4	1	1	1	2	5	0
1	1	1	1	4	2	0
2	2	2	4	3	2	0
1	1	2	2	2	3	0
1	1	2	4	3	3	0
1	1	2	4	3	3	0
4	1	2	2	4	3	0
4	2	2	2	4	1	0
4	1	2	2	4	1	0
2	2	2	1	2	1	0
2	1	2	4	2	5	0
4	1	3	4	3	2	0
4	2	3	3		4	0
1	1	3	2	2	3	0
4	1	3	2	3	1	0
4	2	3	4	1	2	0
1	1	3	3	2	2	0
4	1	4	2	4	2	0
2	1	4	1		4	0
4	1	4	4		4	0
3	1	4	1		4	0
1	1	4	4	2	3	0
4	2	4	2	4	3	0
1	1	4	1	3	4	0
1	2	4	2	2	5	0
3	2	4	1	3	1	0
4	1	4	2	3	2	0
2	2	4	2	1	3	0
1	2	4	1	2	3	0
1	1	4	4	3	3	0
3	1	4	4	3	3	0
1	1	1	2	4	3	0
1	1	1	4	4	4	0
3	1	1	4	3	5	0
1	2	1	2	2	1	0
4	1	2	4	4	2	0
2	1	2	1	1	4	0
3	2	3	2	2	2	0
3	1	3	1		4	0
3	1	3	4	2	3	0
4	1	3	1	3	3	0
1	2	3	2	3	3	0
2	2	3	4	2	4	0
3	2	3	4	4	4	0
2	1	3	4	4	1	0
4	2	3	1	4	1	0
2	1	3	2	4	2	0
3	1	3	1	3	3	0
4	1	4	2	2	2	0
4	1	4	2	2	2	0
3	2	4	1	3	2	0
3	1	4	1		4	0
2	1	4	2	3	3	0
2	1	4	3	3	3	0
2	1	4	4	4	3	0
3	1	4	4	4	4	0
3	2	4	2	3	1	0
3	2	4	2	3	1	0
2	1	4	4	3	2	0
1	2	4	4	3	3	0
2	1	2	4	2	3	0
4	1	2	2	2	2	0
4	1	2	2	2	2	0
4	1	2	1	3	5	0
2	1	2	4	3	5	0
2	2	3	1	2	2	0
1	2	3	4	2	3	0
3	2	3	2	3	3	0
3	1	3	4	2	5	0
3	2	3	1	4	2	0
4	1	3	4	2	5	0
1	2	3	4	2	5	0
3	1	4	2		4	0
2	2	4	2		4	0
2	2	4	4		4	0
3	2	4	2	3	3	0
4	2	4	2	4	3	0
4	1	4	2	4	3	0
4	1	4	4	3	2	0
3	1	4	1	3	3	0
2	2	1	4	2	2	0
3	1	1	2		4	0
3	1	1	1	2	3	0
3	2	1	4	3	5	0
4	1	1	4	2	2	0
2	1	1	2	3	2	0
1	1	1	3	4	2	0
3	2	2	4	3	4	0
2	2	2	1	4	4	0
3	2	2	4	3	5	0
2	2	2	2	4	5	0
2	2	2	4	3	1	0
1	2	3	3	2	2	0
4	1	3	1		4	0
3	2	3	4		4	0
1	1	3	2		4	0
3	1	3	2	4	3	0
3	2	3	2	2	4	0
1	2	3	3	2	4	0
3	1	3	4	3	4	0
4	1	3	1	3	4	0
4	1	3	4	2	3	0
1	2	3	4	3	3	0
3	2	4	4	2	2	0
2	2	4	4	3	2	0
4	2	4	1	3	2	0
3	2	4	2		4	0
4	2	4	1	3	3	0
2	2	4	2	4	3	0
3	1	4	4	4	3	0
4	1	4	3	2	4	0
1	1	4	1	3	4	0
4	2	4	2	2	5	0
4	2	4	1	3	5	0
4	1	4	1	3	3	0
1	1	1	3	2	1	0
1	1	1	1	1	5	0
4	2	1	2	3	5	0
1	2	2	4	2	2	0
4	2	2	4	4	3	0
1	2	2	4	2	5	0
1	2	2	4	3	2	0
2	2	3	2	2	2	0
2	2	3	1	3	2	0
2	1	3	2	2	3	0
1	2	3	1	2	3	0
3	2	3	2	3	4	0
4	2	3	4	3	4	0
2	2	3	4	4	4	0
1	1	3	4	4	4	0
1	2	3	2	3	5	0
3	2	3	4	4	1	0
4	2	3	2	4	1	0
2	1	3	4	3	2	0
1	2	3	4	3	3	0
4	1	3	4	4	5	0
3	2	3	2	4	5	0
1	1	3	3	4	5	0
1	2	4	2	2	4	0
4	2	4	1	2	4	0
2	1	4	1	4	4	0
4	2	4	3	3	5	0
4	2	4	1	3	5	0
4	2	4	1	4	1	0
4	1	4	1	3	2	0
3	1	4	4	4	5	0
1	1	1	2	2	3	0
1	2	1	3	4	1	0
3	1	1	4	3	4	0
4	1	1	3	4	5	0
1	2	1	2	2	1	0
4	1	1	3	2	1	0
3	1	1	4	3	3	0
3	2	2	1	3	2	0
3	2	2	1	2	3	0
1	1	2	4	3	4	0
2	2	2	3	3	5	0
2	1	2	2	4	1	0
1	1	2	1	3	2	0
3	2	2	1	2	3	0
4	1	2	1	2	5	0
2	2	2	2	2	5	0
2	1	3	2	4	3	0
3	2	3	1	2	4	0
4	2	3	4	3	4	0
4	2	3	1	3	4	0
1	1	3	4	3	5	0
1	2	3	4	1	3	0
4	1	3	3	3	5	0
4	2	4	1	3	2	0
4	1	4	4	4	2	0
2	2	4	2	2	3	0
2	1	4	3	3	3	0
3	2	4	2	2	4	0
1	2	4	4	3	4	0
4	2	4	1	2	5	0
4	2	4	4	3	5	0
4	2	4	1	2	1	0
3	1	4	1	3	2	0
1	2	4	2	3	3	0
3	1	1	2	3	2	0
1	1	1	4	3	2	0
3	1	1	2	2	3	0
1	1	1	1	4	5	0
1	2	1	4	2	3	0
4	2	1	2	3	5	0
1	1	2	4		4	0
1	2	2	1		4	0
3	2	2	2	3	3	0
4	1	2	1	3	5	0
3	1	2	1	3	3	0
3	1	2	1	2	5	0
3	1	2	4	4	5	0
4	1	3	2	2	2	0
1	1	3	1	3	2	0
1	2	3	2		4	0
1	1	3	2		4	0
1	1	3	4		4	0
1	2	3	4		4	0
1	1	3	4		4	0
4	2	3	4		4	0
2	2	3	1	2	3	0
4	1	3	4	2	1	0
1	2	3	2	2	5	0
1	2	3	4	3	2	0
3	1	3	2	3	3	0
1	2	3	2	3	5	0
4	2	4	4	4	2	0
1	1	4	1		4	0
3	2	4	1		4	0
1	1	4	1		4	0
4	2	4	2	4	3	0
1	2	4	3	4	3	0
2	2	4	4	3	4	0
4	1	4	1	3	4	0
3	2	4	1	3	4	0
4	2	4	1	3	1	0
2	1	4	4	3	2	0
2	2	4	3	3	3	0
4	1	4	4	2	5	0
1	1	4	1	3	5	0
3	1	1	1	1	2	0
3	2	1	1	2	5	0
2	1	1	1	2	5	0
2	2	1	4	2	5	0
1	2	1	4	2	5	0
3	1	1	2	2	1	0
4	2	1	2	4	1	0
1	1	2	4	3	2	0
2	1	2	3		4	0
3	2	2	4	3	1	0
3	2	2	1	3	2	0
2	2	3	1		4	0
3	2	3	2		4	0
2	1	3	1	3	3	0
4	2	3	4	3	3	0
3	1	3	2	3	3	0
3	2	3	4	4	3	0
3	2	3	4	3	4	0
1	2	3	1	3	4	0
1	1	3	4	3	5	0
3	2	3	1	3	5	0
4	1	4	2	3	2	0
3	2	4	1		4	0
1	2	4	4	3	4	0
3	2	4	4	3	4	0
1	1	4	4	3	4	0
4	1	4	4	2	5	0
4	1	4	2	2	3	0
1	2	4	1	3	5	0
3	1	1	1	4	3	0
1	1	1	2	4	5	0
2	2	2	1	2	3	0
3	1	3	1	2	5	0
1	1	3	2	3	1	0
1	1	3	2	4	2	0
1	1	3	4	3	5	0
4	1	4	4	3	2	0
4	1	4	4		4	0
2	2	4	1	2	3	0
4	1	4	1	3	3	0
2	2	4	2	2	4	0
2	1	4	1	3	4	0
4	1	4	2	3	1	0
4	2	4	4	3	1	0
2	2	4	1	3	2	0
3	2	4	2	3	2	0
1	2	4	1	3	2	0
1	1	1	4	2	2	0
4	1	1	2	1	3	0
4	2	1	1	2	5	0
2	1	1	1	3	5	0
2	1	1	1	3	5	0
2	2	2	2		4	0
4	2	2	4		4	0
2	2	2	1	3	3	0
2	1	2	1	3	3	0
4	1	2	1	3	1	0
2	2	2	2	3	5	0
3	1	2	2	4	5	0
2	2	3	4		4	0
2	2	3	3	4	3	0
3	2	3	1	3	4	0
4	2	3	4	3	3	0
4	1	3	2	3	5	0
2	2	4	2		4	0
4	1	4	3		4	0
4	1	4	3	2	4	0
3	2	4	1	3	5	0
2	2	1	4	4	2	0
1	1	1	2	2	3	0
4	1	1	1	3	5	0
[truncated: 1,971 more rows]
